# Supplementary material for: Lipase Catalyzed Synthesis of Enantiopure Precursors and Derivatives for β-Blockers Practolol, Pindolol and Carteolol
Source: MDPI journal article supplement (doi:10.3390/catal11040503), 2021-04-16
Supplement: s1 [file s1]

# Lipase Catalyzed Synthesis of Enantiopure Precursors and Derivatives for $\beta$ -Blockers Practolol, Pindolol and Carteolol

Morten Andre Gundersen, Guro Buaas Austli, Sigrid Sløgedal Løvland, Mari Bergan Hansen, Mari Rødseth and Elisabeth Egholm Jacobsen \*

<sup>1</sup> Department of chemistry, Norwegian University of Science and Technology, Høgskoleringen 5, 7491 Trondheim, Norway; morten\_gundersen@hotmail.no (M.A.G.); guro.austli@gmail.com (G.B.A.); Sigrid.lovland@gmail.com (S.S.L.); mari.bergan@live.no (M.B.H.); marrods@stud.ntnu.no (M.R.)

\* Correspondence: elisabeth.e.jacobsen@ntnu.no; Tel.: +47 73596256

## 1.1. <sup>1</sup>H NMR Spectra

a) *N*-(4-(3-Chloro-2-hydroxypropoxy)phenyl)acetamide, **1a**

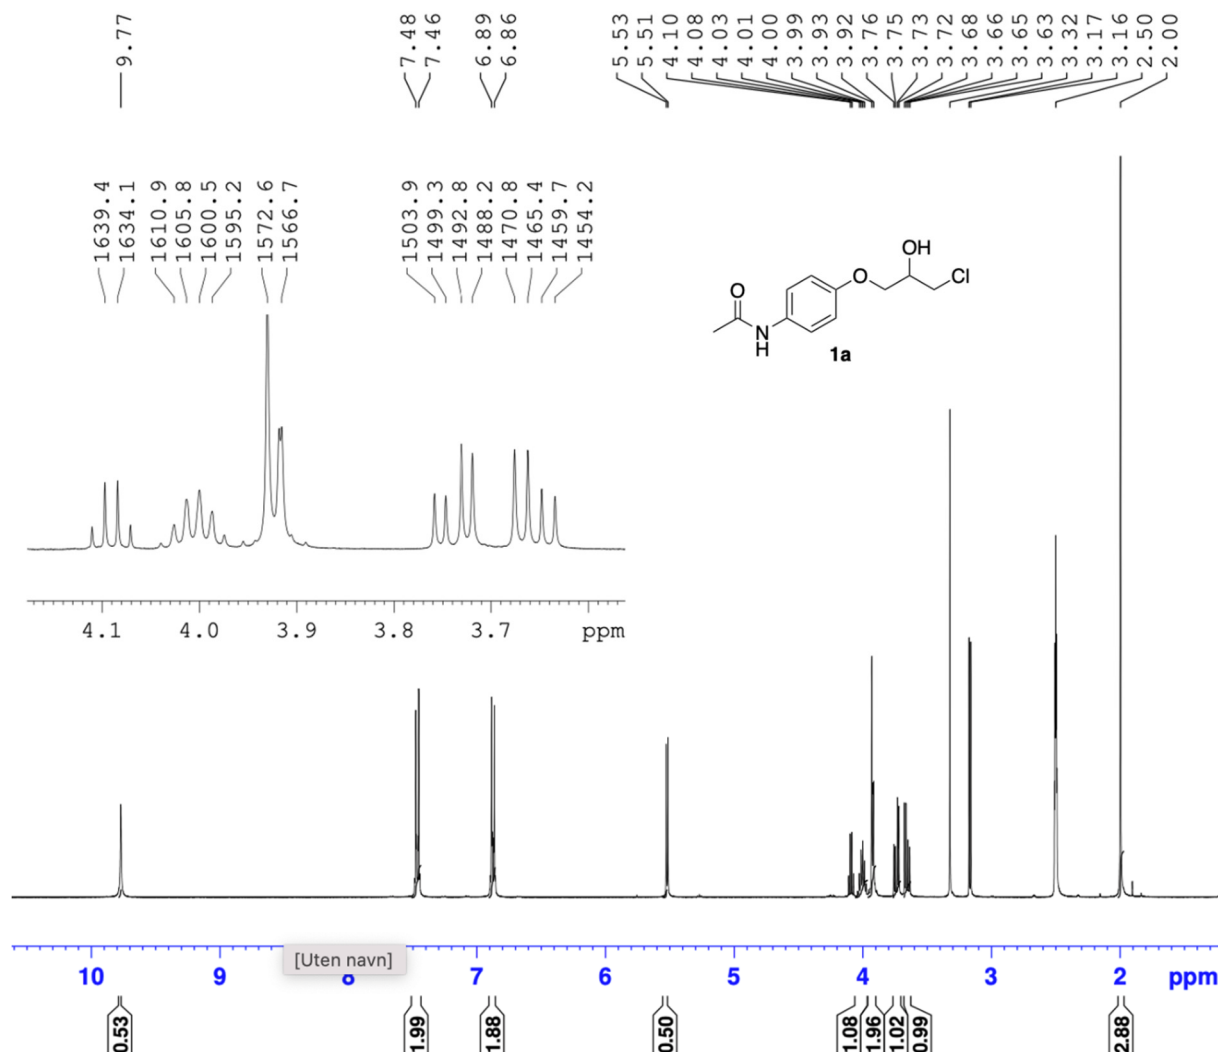

## b) 1-((1H-Indol-4-yl)oxy)-3-chloropropan-2-ol, 2a

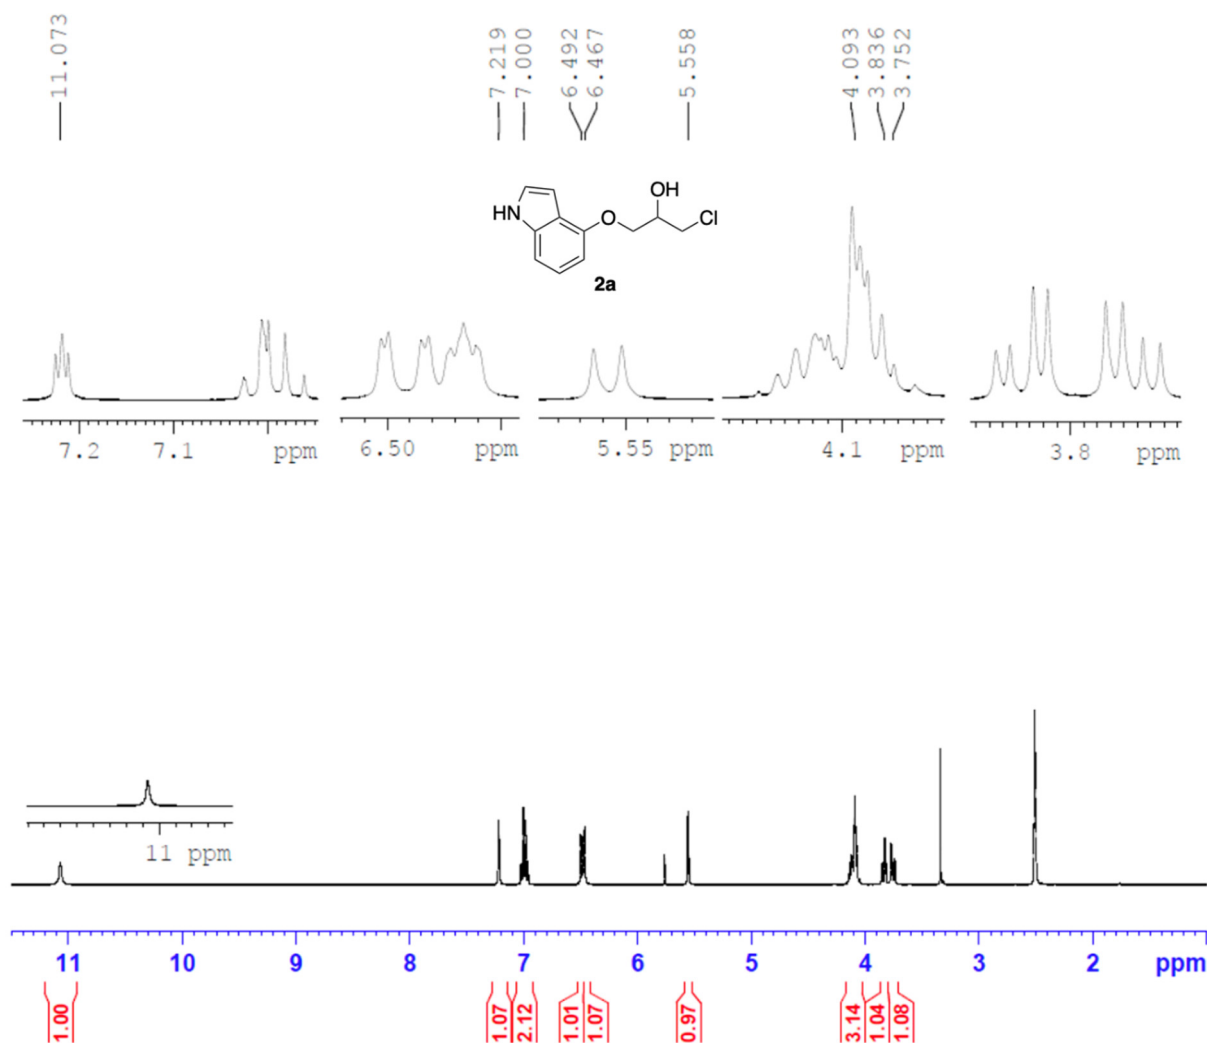

c) 1-((1H-Indol-4-yl)oxy)-3-chloropropan-2-yl butanoate, 2e

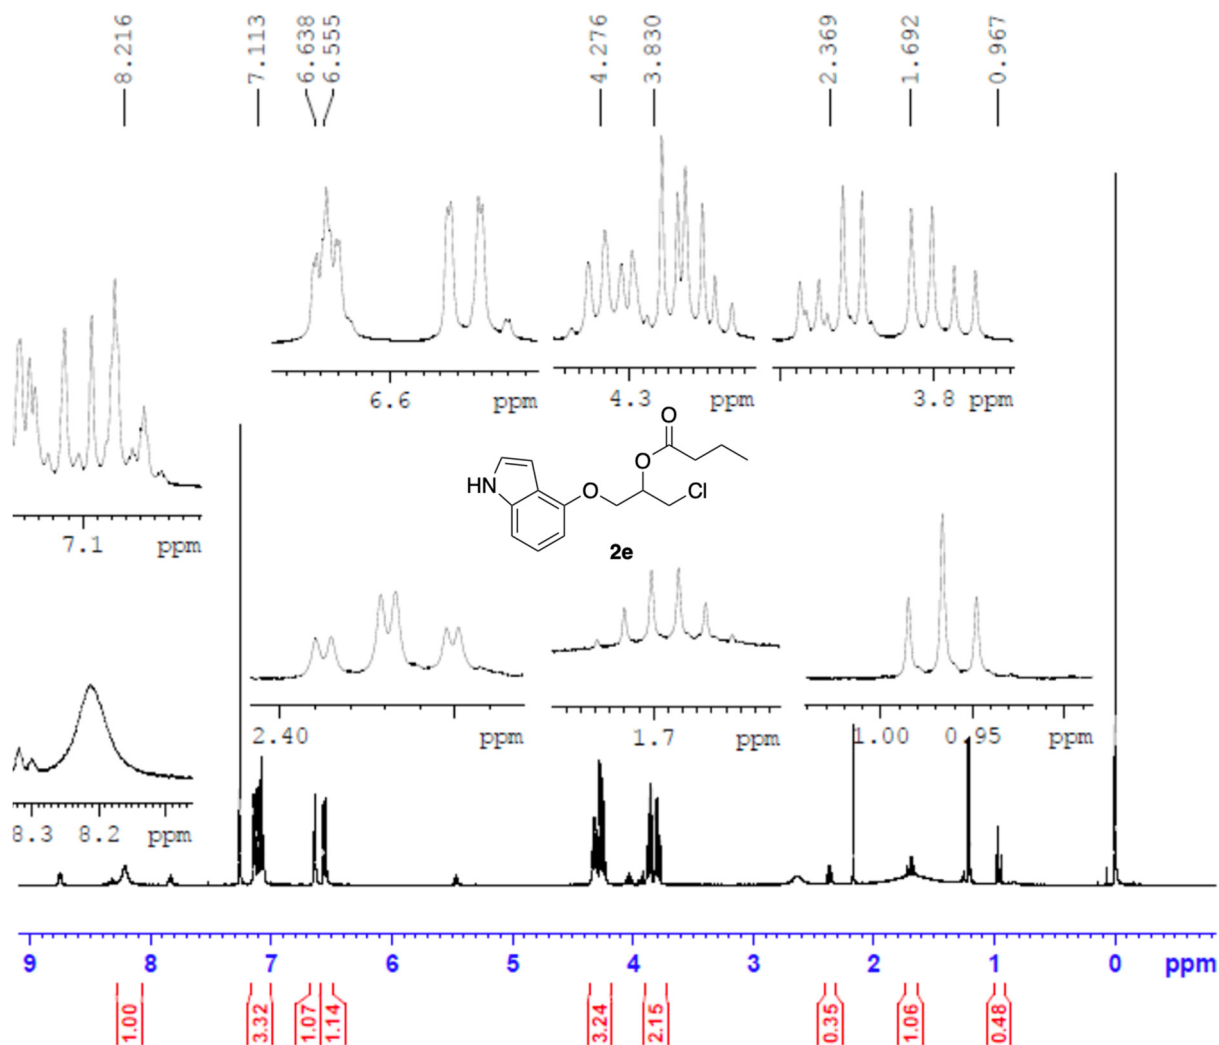

## d) 7-(Oxiran-2-ylmethoxy)-3,4-dihydroquinolin-2(1H)-one, 3e

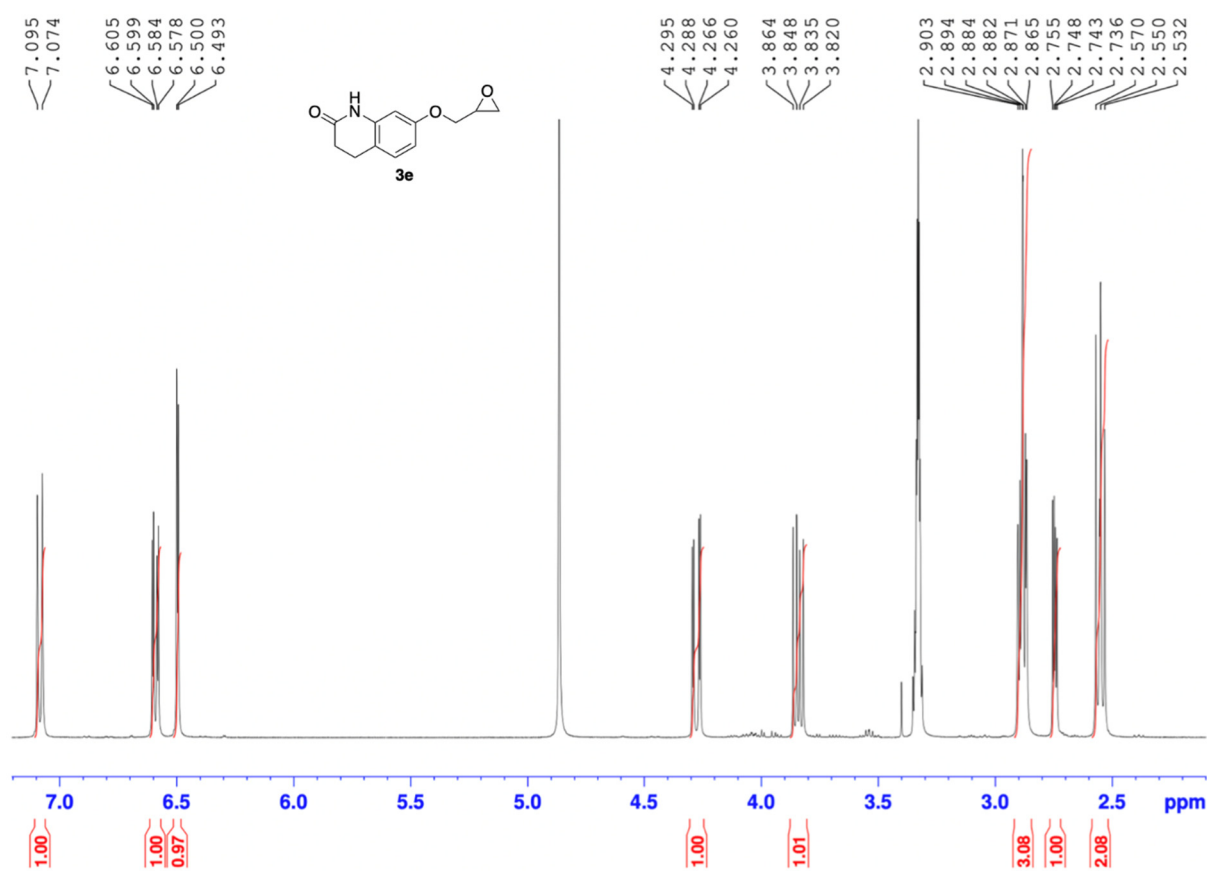

## e) 7-(3-Chloro-2-hydroxypropoxy)-3,4-dihydroquinolin-2(1H)-one, 3a

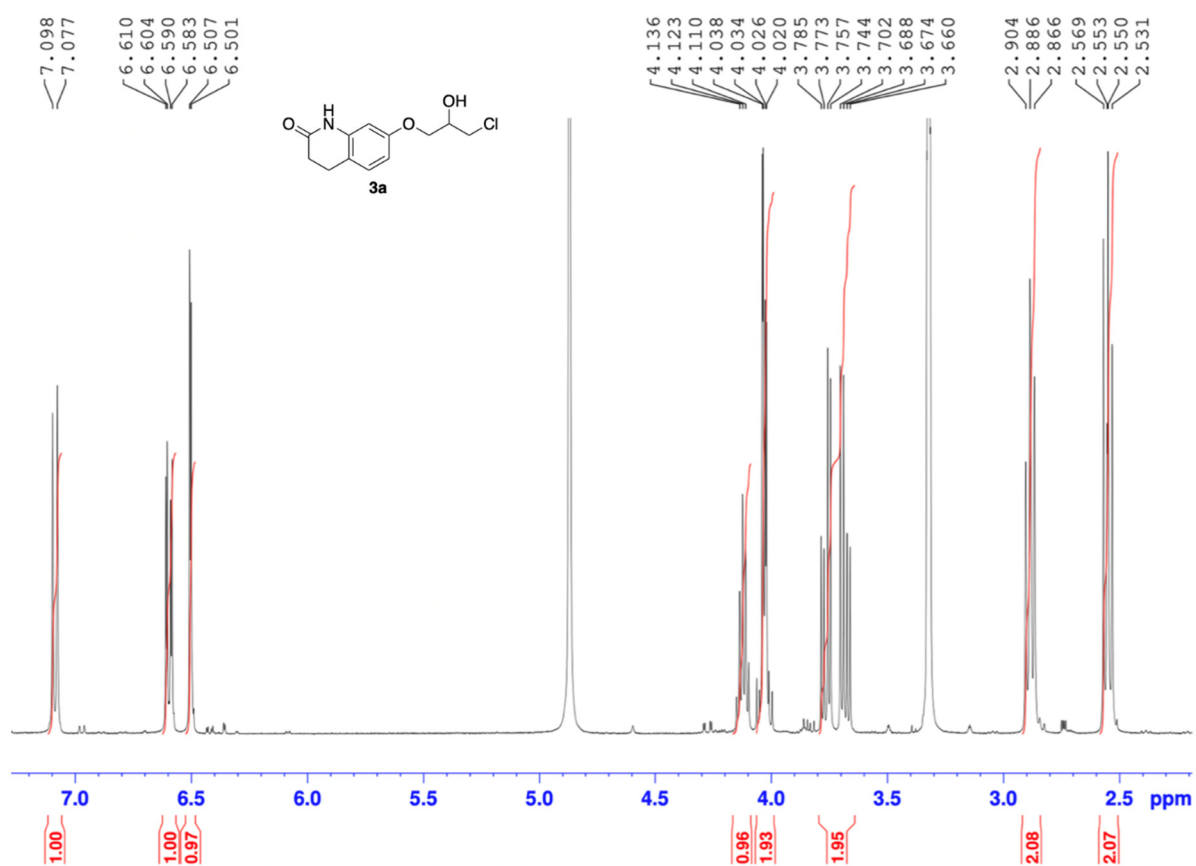

## f) (S)-1-Chloro-3-((2-oxo-1,2,3,4-tetrahydroquinolin-7-yl)oxy)propan-2-yl butanoate, (S)-3b

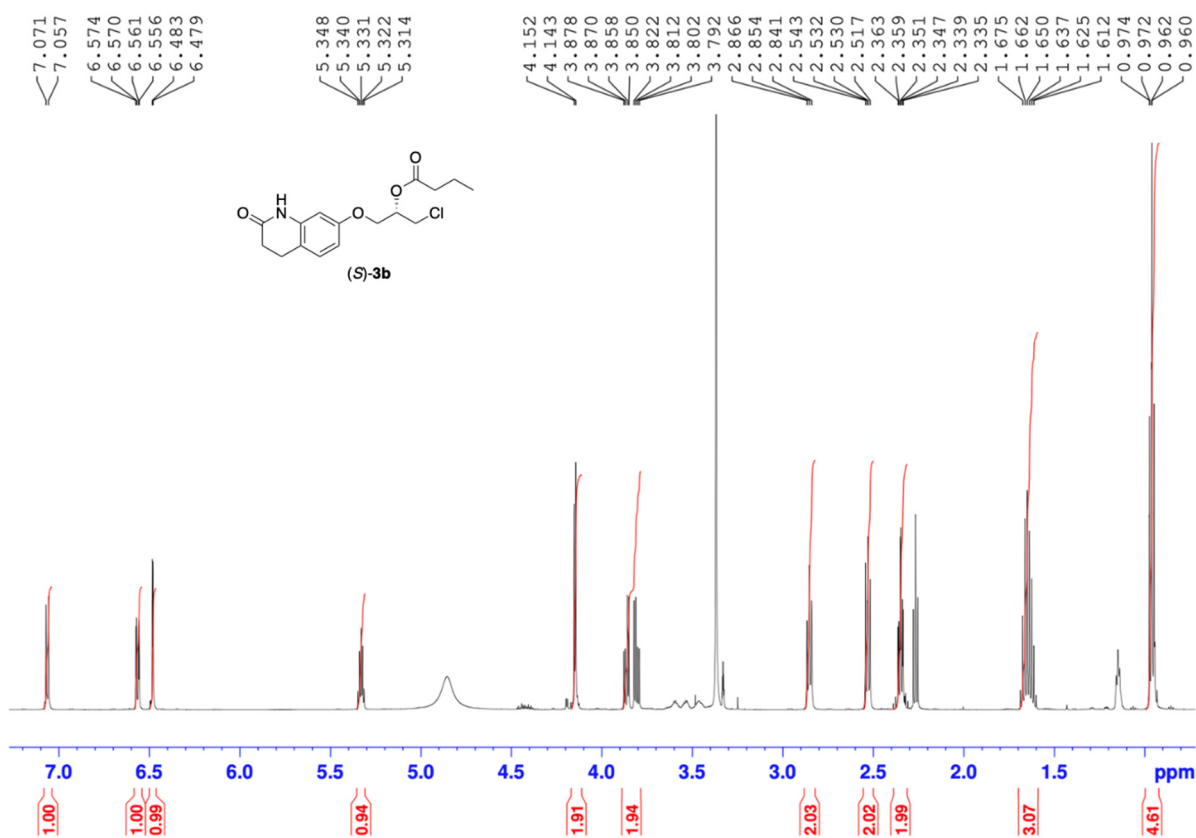

## g) 5-(3-Chloro-2-hydroxypropoxy)-3,4-dihydroquinolin-2(1H)-one, 4a

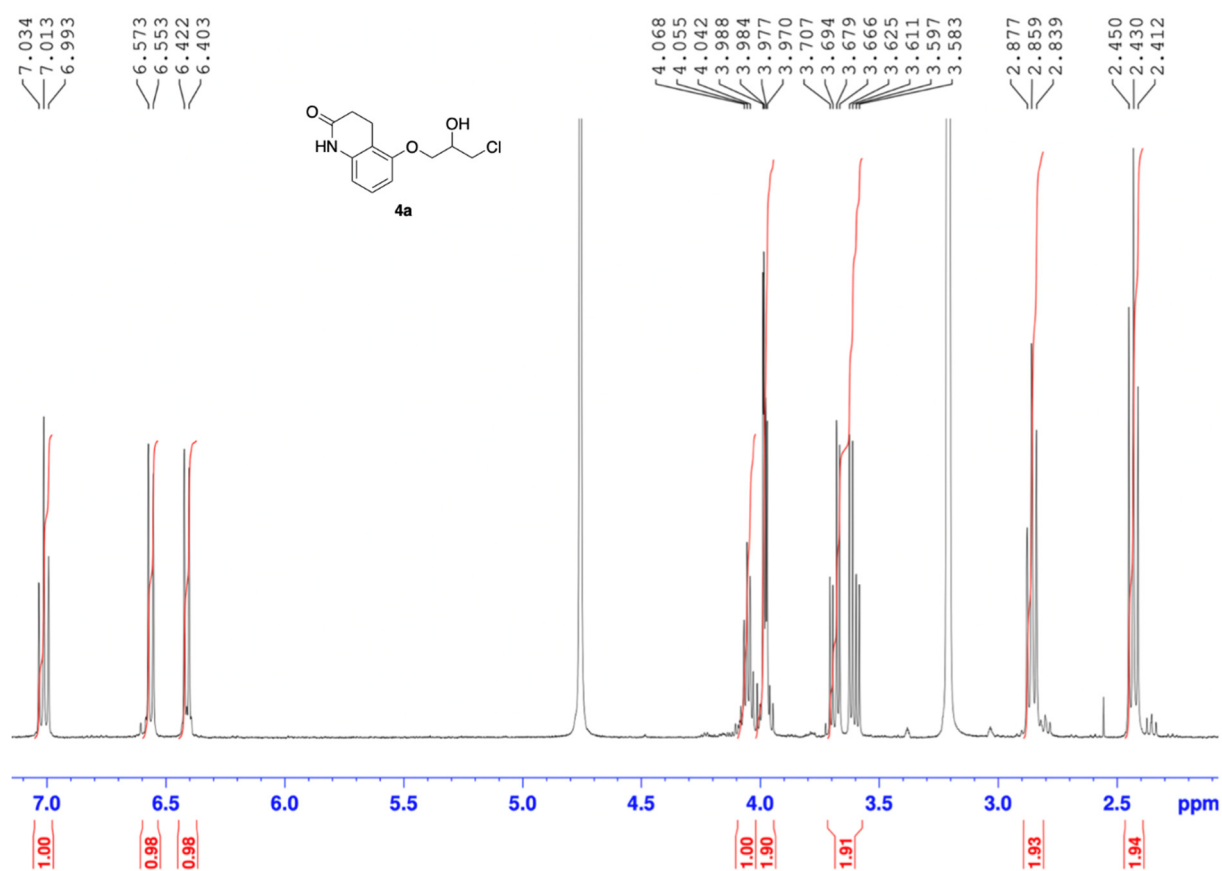

## h) (S)-1-Chloro-3-((2-oxo-1,2,3,4-tetrahydroquinolin-5-yl)oxy)propan-2-yl butanoate, (S)-4b

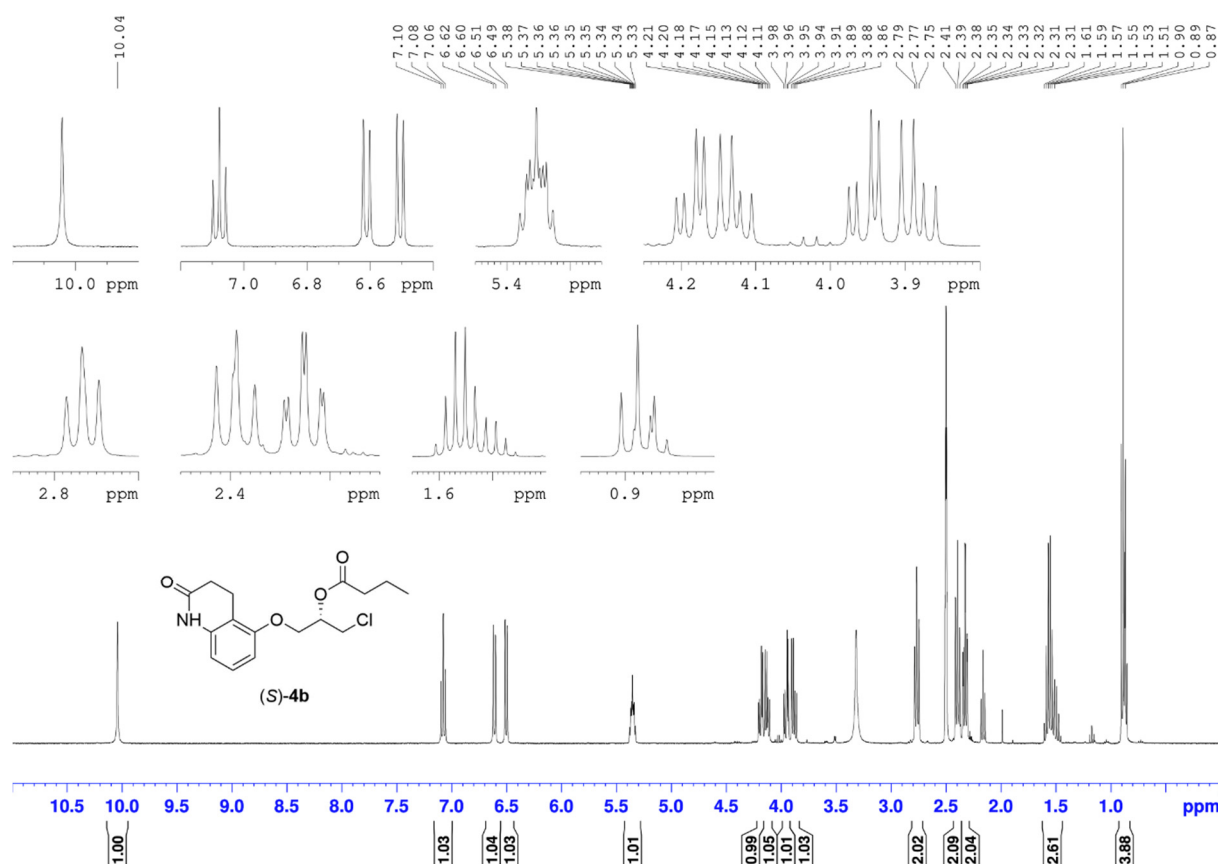



## i) Practolol, (N-(4-(2-hydroxy-3-(isopropylamino)propoxy)phenyl)acetamide), 1c

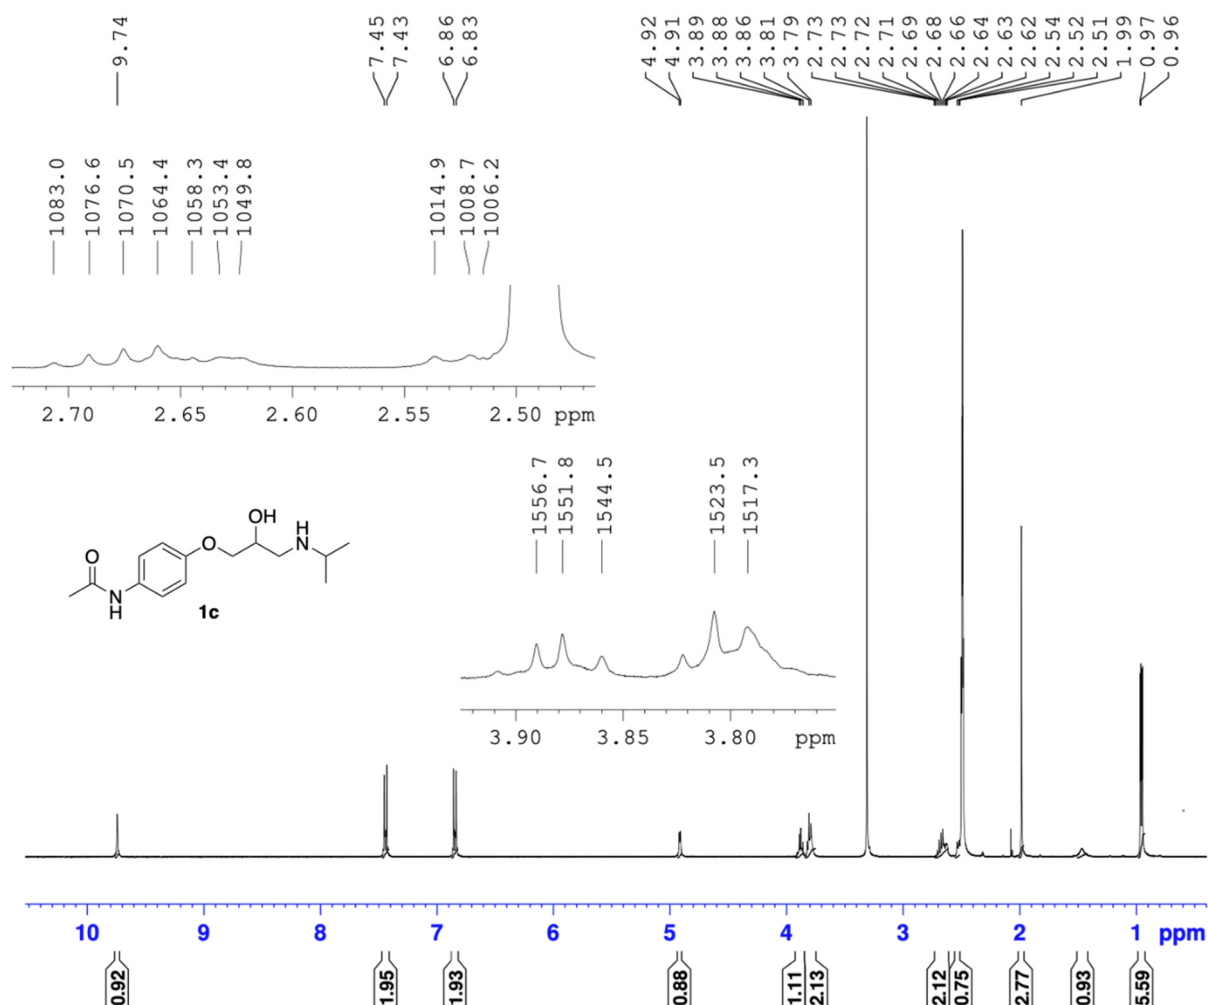

## j) (S)-7-(3-(tert-Butylamino)-2-hydroxypropoxy)-3,4-dihydroquinolin-2(1H)-one, (S)-3c

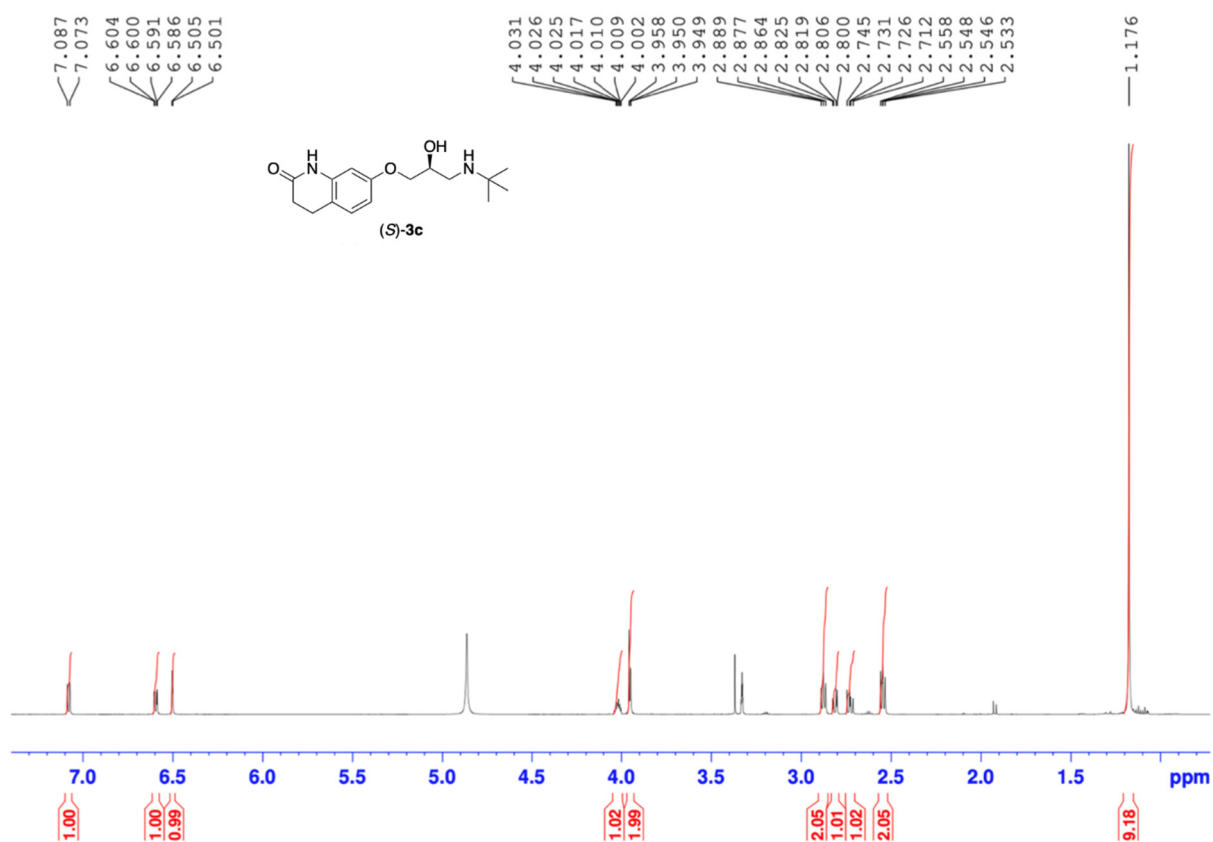

## 2. $^{13}\text{C}$ NMR Spectra

### a) *N*-(4-(3-Chloro-2-hydroxypropoxy)phenyl)acetamide, 1a

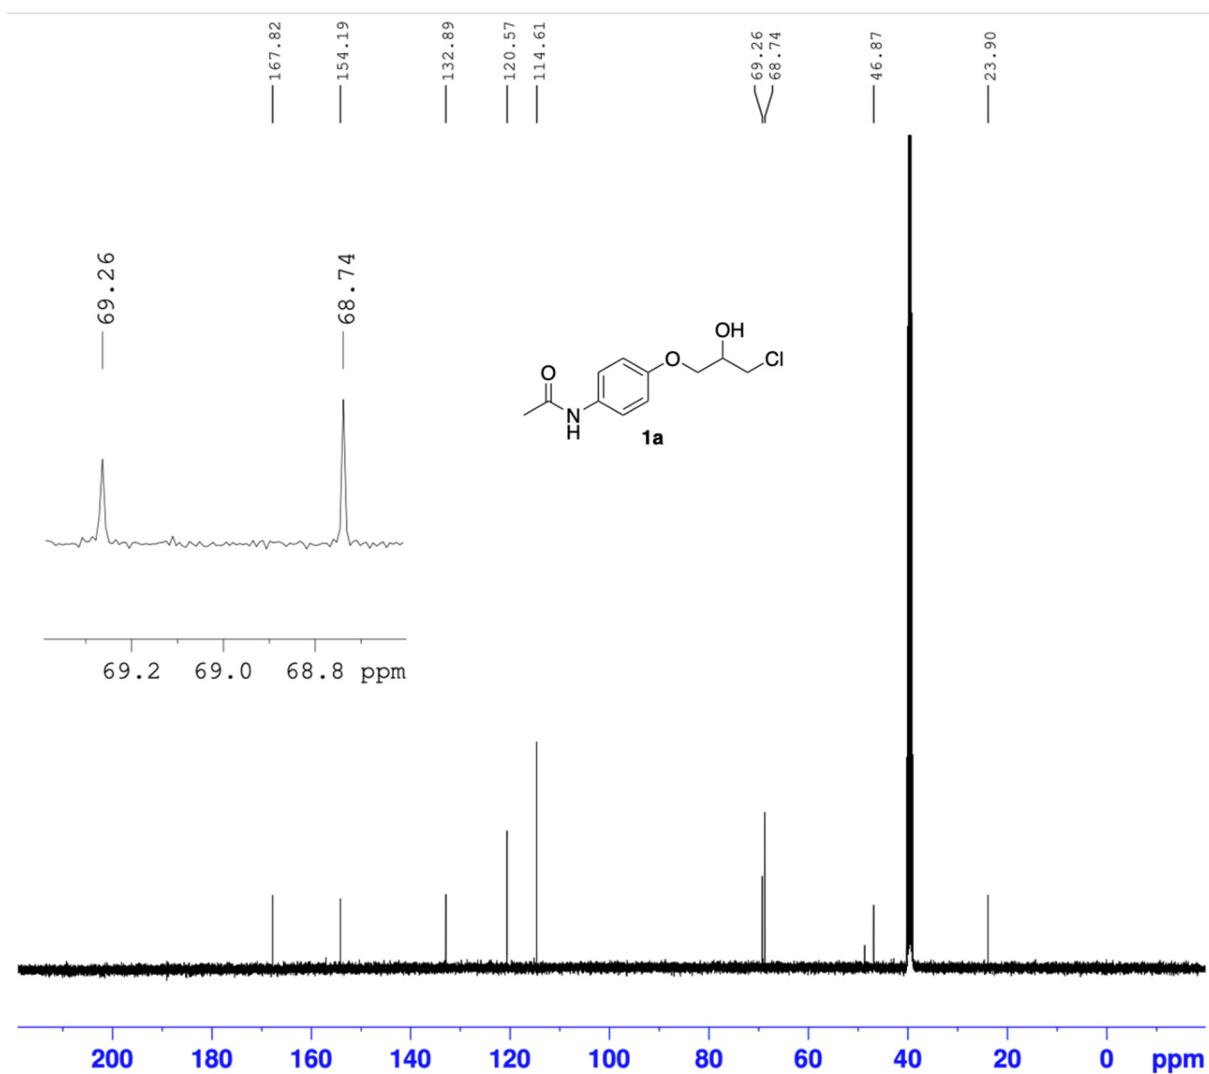

## b) 1-((1H-Indol-4-yl)oxy)-3-chloropropan-2-ol, 2a

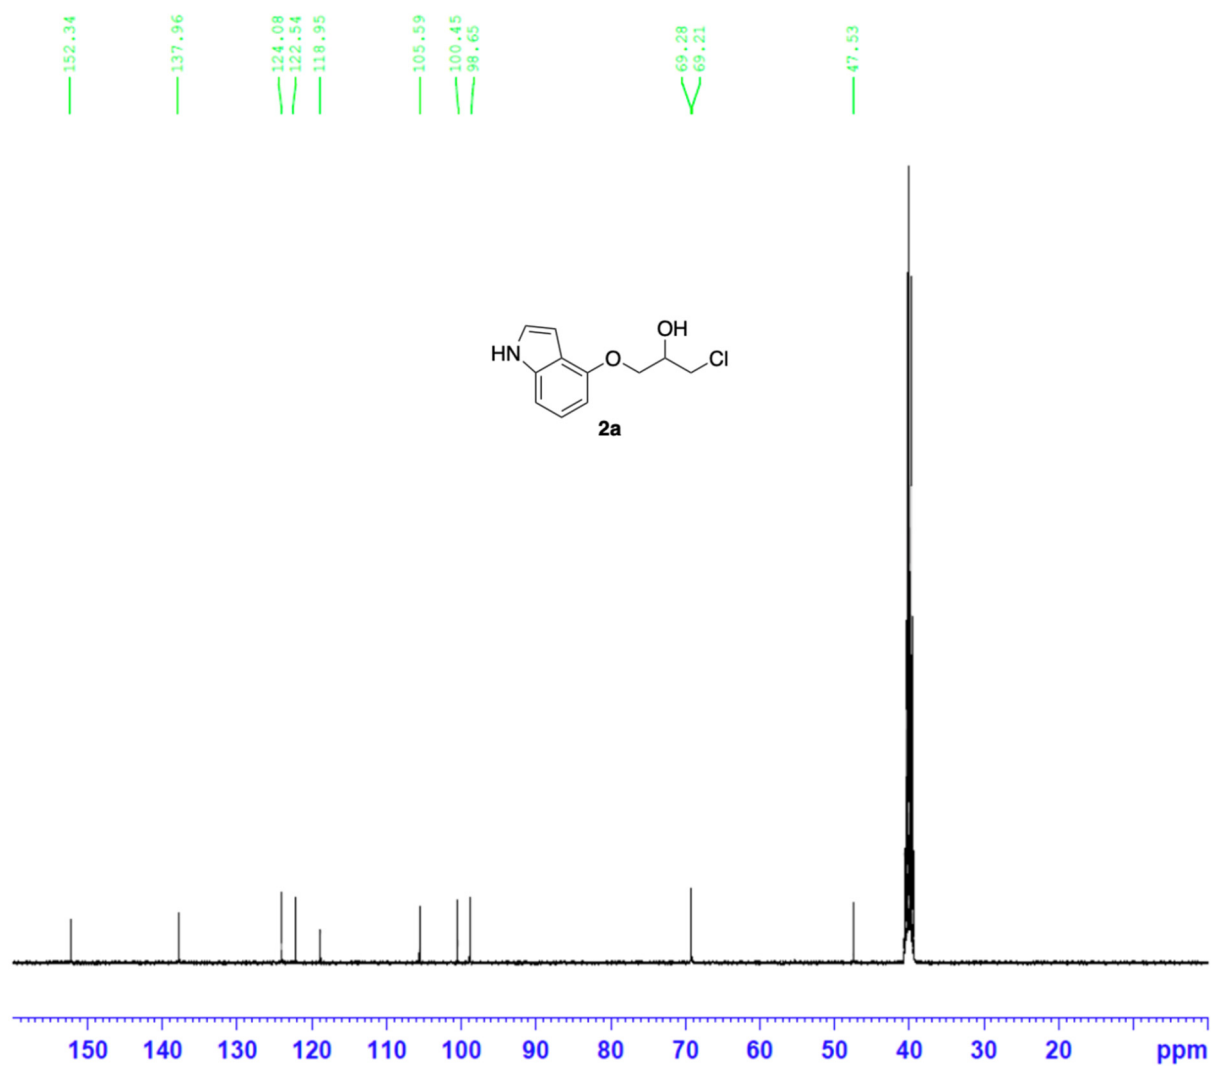

## c) 1-((1H-Indol-4-yl)oxy)-3-chloropropan-2-yl butanoate, 2e

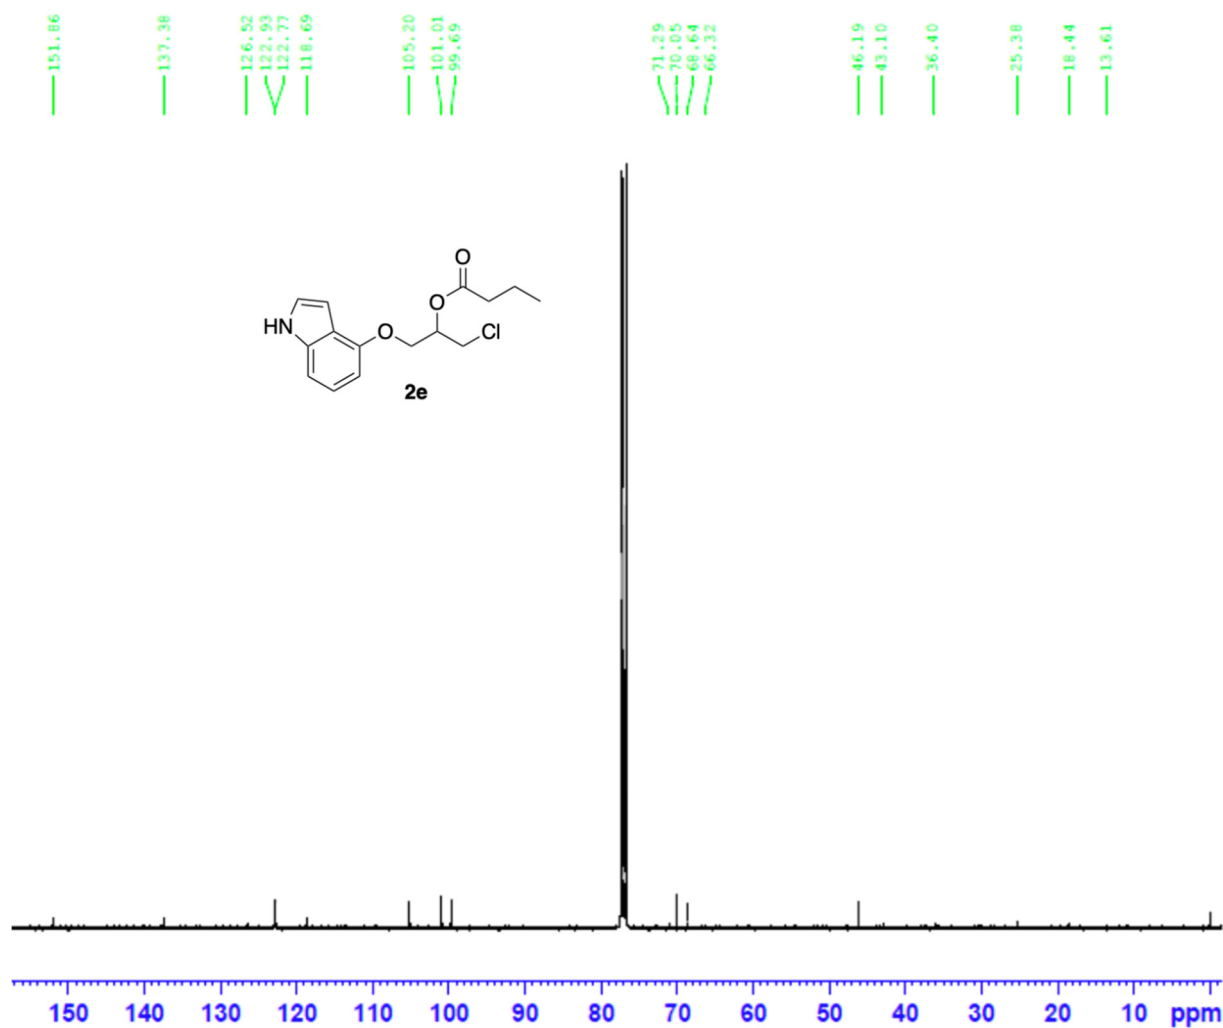

*d) 7-(Oxiran-2-ylmethoxy)-3,4-dihydroquinolin-2(1H)-one, 3e*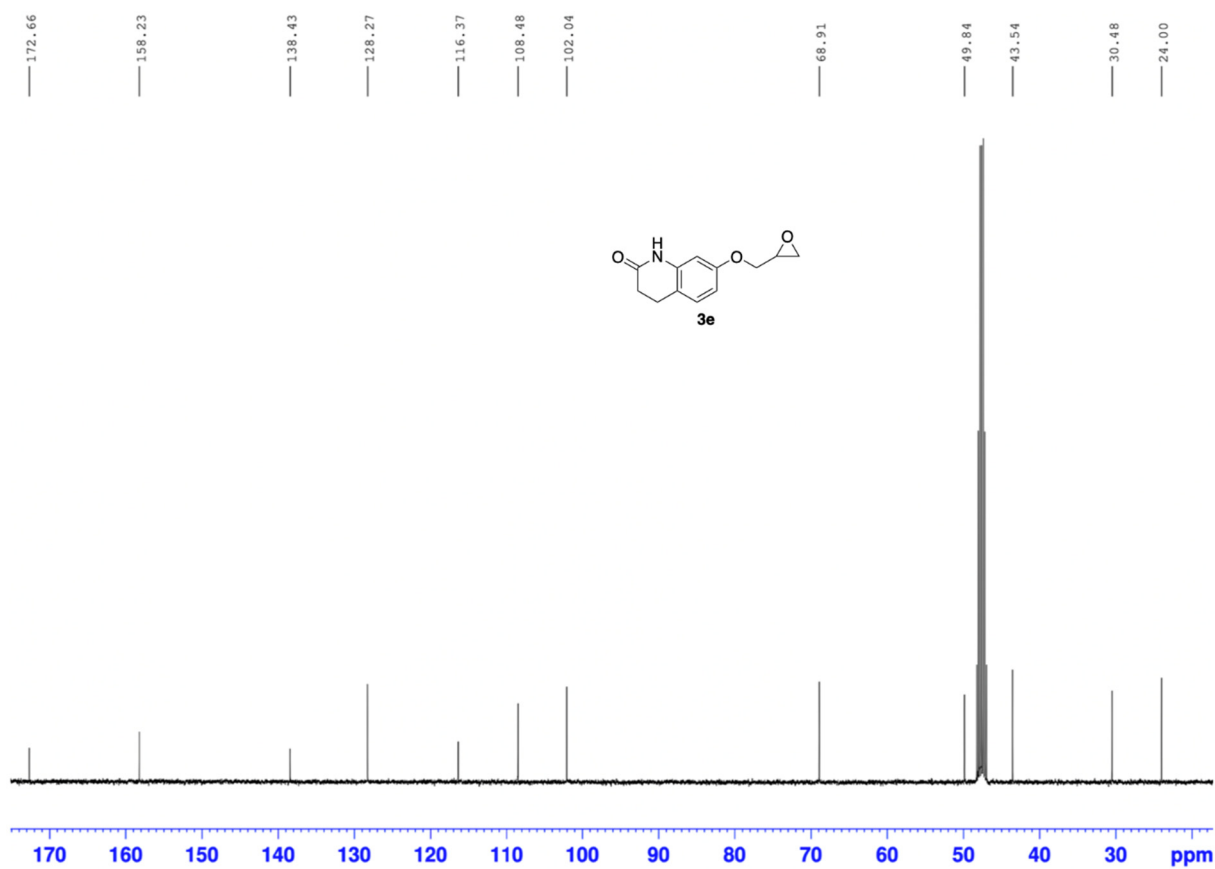

*e) 7-(3-Chloro-2-hydroxypropoxy)-3,4-dihydroquinolin-2(1H)-one, 3a*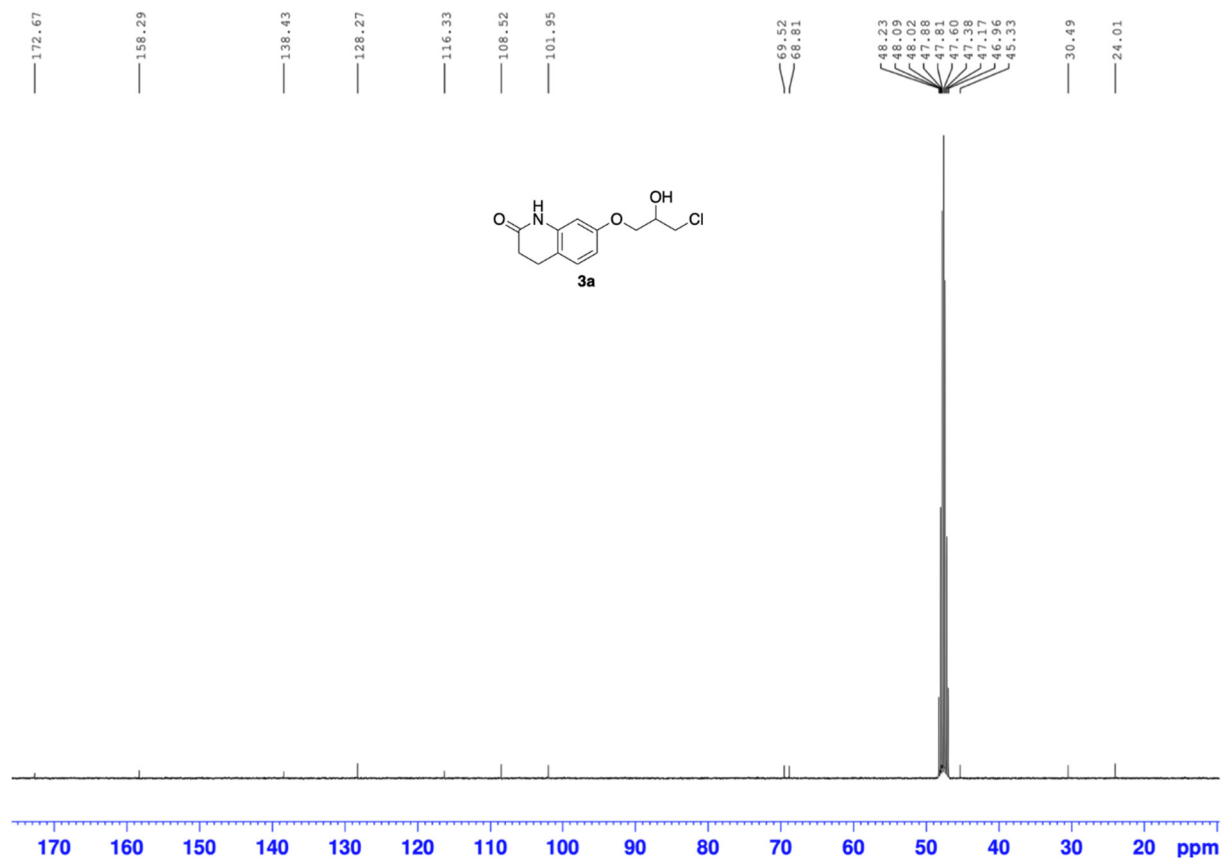

*f) (S)-1-Chloro-3-((2-oxo-1,2,3,4-tetrahydroquinolin-7-yl)oxy)propan-2-yl butanoate, (S)-3b*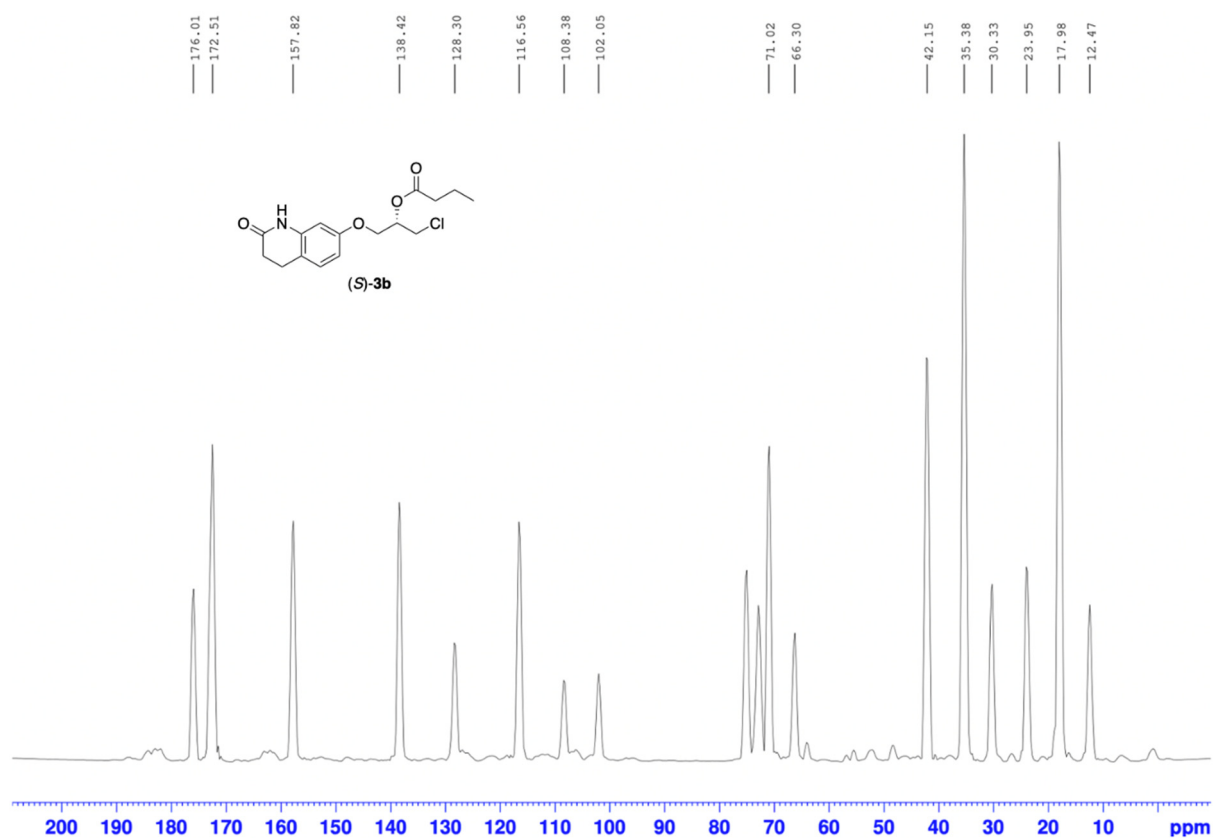



## g) 5-(3-Chloro-2-hydroxypropoxy)-3,4-dihydroquinolin-2(1H)-one, 4a

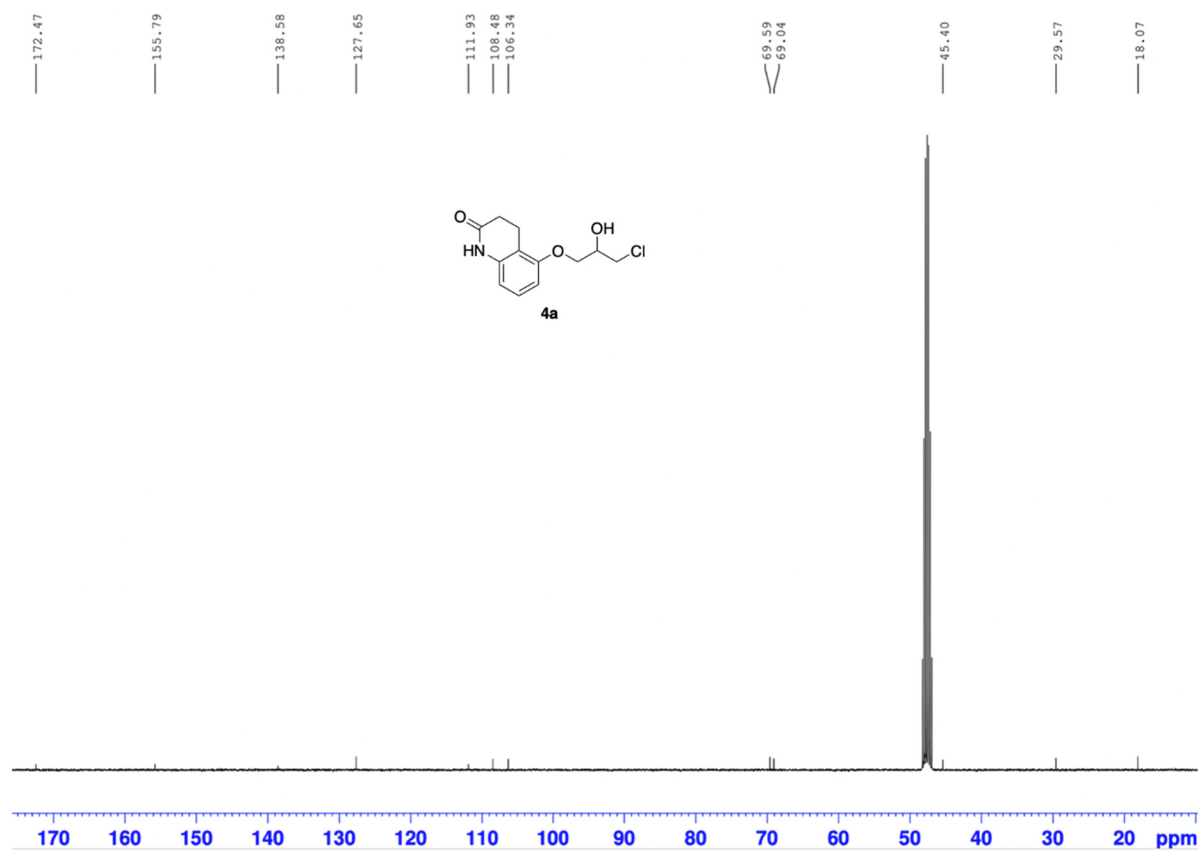

*h) (S)-1-Chloro-3-((2-oxo-1,2,3,4-tetrahydroquinolin-5-yl)oxy)propan-2-yl butanoate, (S)-4b*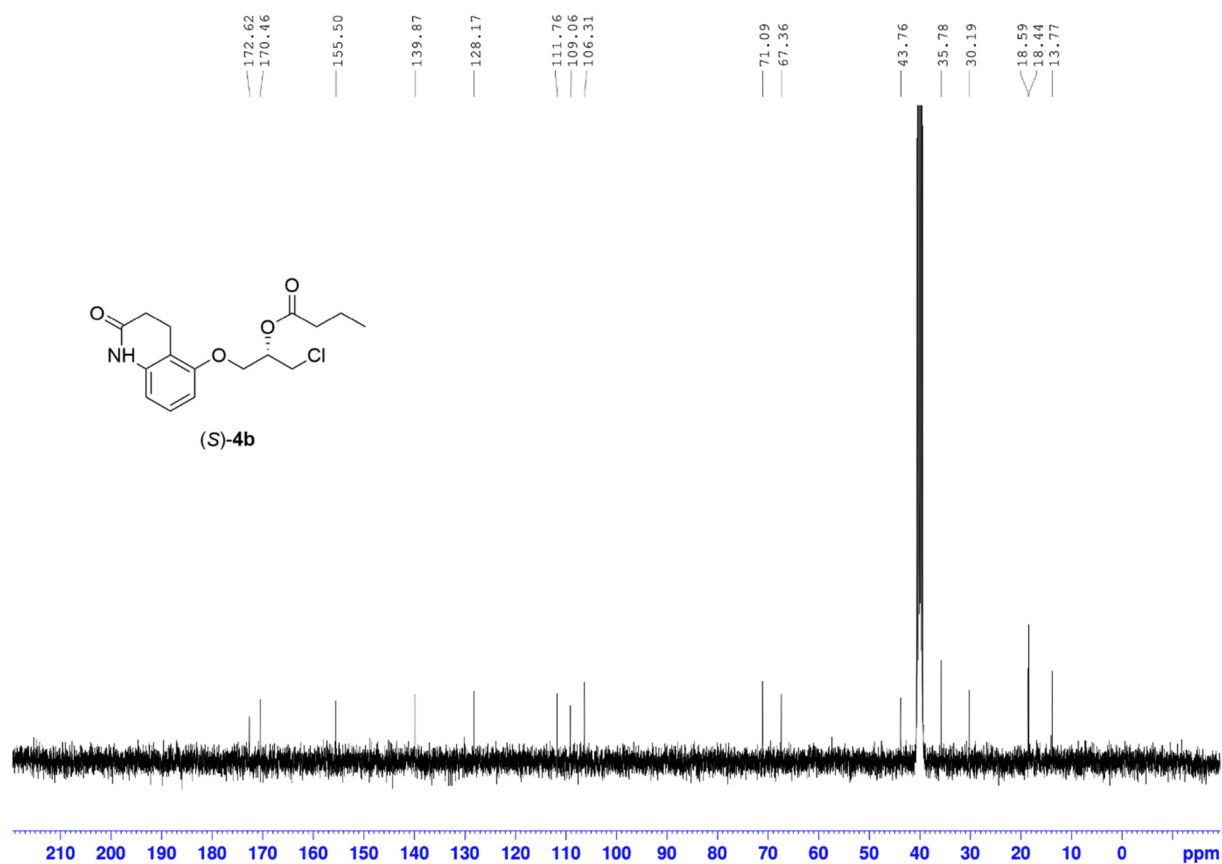

## i) Practolol, (N-(4-(2-hydroxy-3-(isopropylamino)propoxy)phenyl)acetamide), 1c

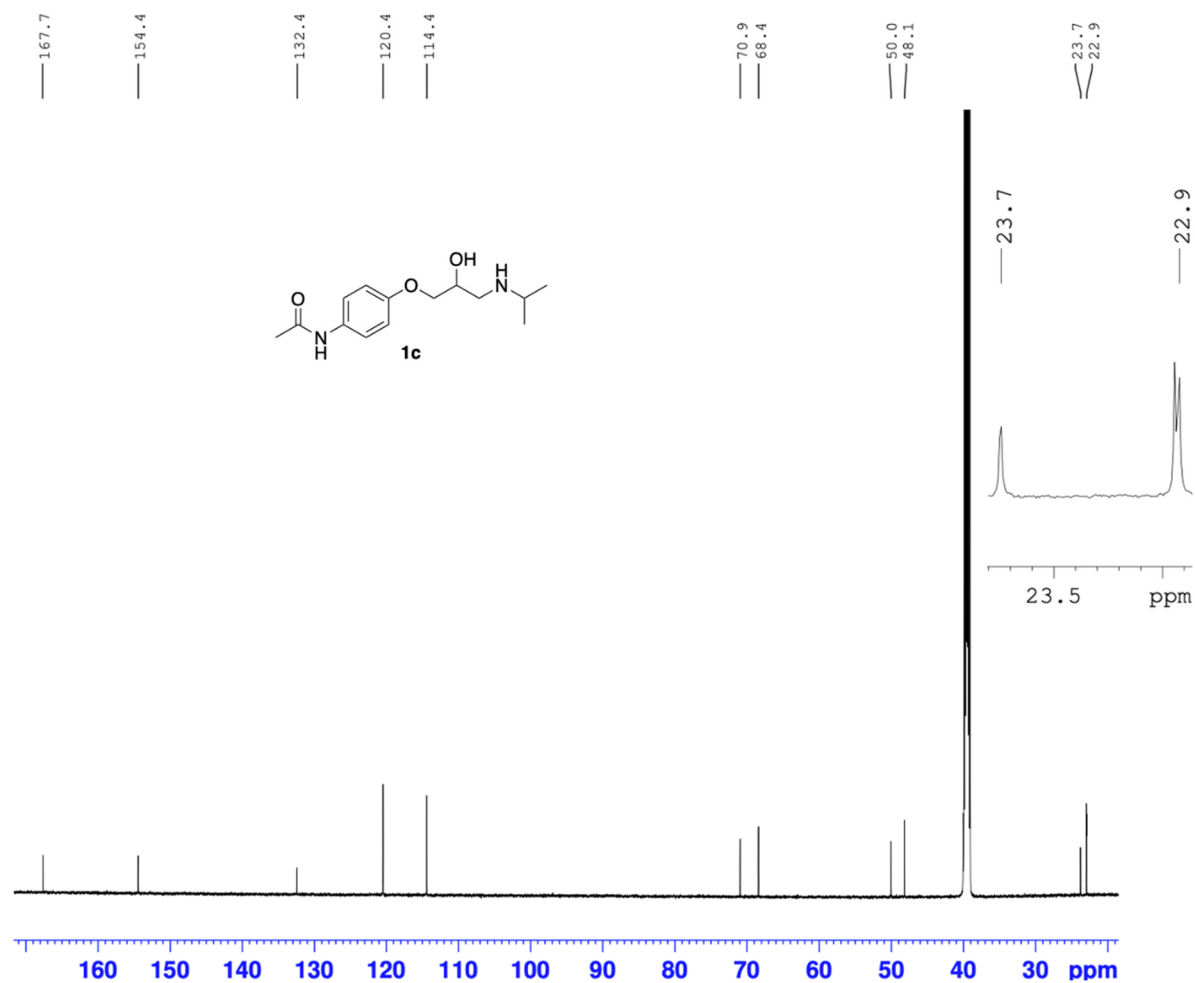

## j) (S)-7-(3-(tert-Butylamino)-2-hydroxypropoxy)-3,4-dihydroquinolin-2(1H)-one, (S)-3c

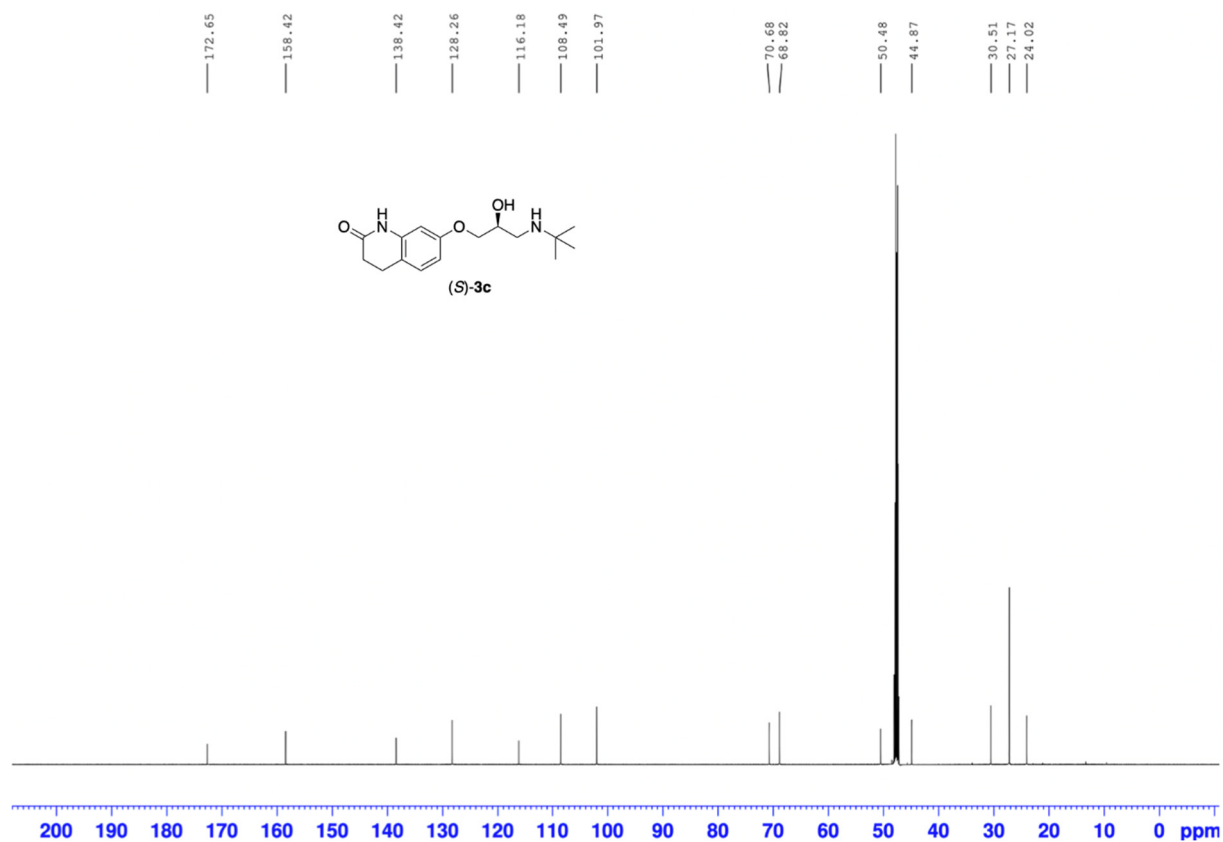

### 3. Mass Spectra

a) *N*-(4-(3-chloro-2-hydroxypropoxy)phenyl)acetamide, 1a

#### Elemental Composition Report

Page 1

#### Single Mass Analysis

Tolerance = 5.0 PPM / DBE: min = -1.5, max = 50.0

Element prediction: Off

Number of isotope peaks used for i-FIT = 3

Monoisotopic Mass, Even Electron Ions

2735 formula(e) evaluated with 4 results within limits (all results (up to 1000) for each mass)

Elements Used:

C: 0-500 H: 0-1000 N: 0-200 O: 0-200 S: 0-6 Cl: 0-8 Br: 0-8

SVG\_20180201\_LCMS\_guro28 261 (4.814) AM2 (Ar,20000.0,0.00,0.00); Cm (261:262)

1: TOF MS ES+

1.29e+007

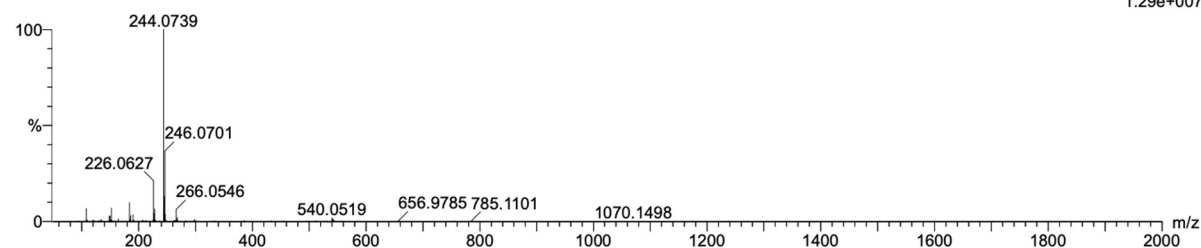

Minimum: -1.5  
Maximum: 5.0 5.0 50.0

| Mass     | Calc. Mass | mDa  | PPM  | DBE | i-FIT | Norm   | Conf (%) | Formula          |
|----------|------------|------|------|-----|-------|--------|----------|------------------|
| 244.0739 | 244.0740   | -0.1 | -0.4 | 4.5 | 942.8 | 0.007  | 99.30    | C11 H15 N O3 Cl  |
|          | 244.0747   | -0.8 | -3.3 | 0.5 | 947.9 | 5.138  | 0.59     | C4 H15 N7 O S Cl |
|          | 244.0732   | 0.7  | 2.9  | 0.5 | 949.6 | 6.792  | 0.11     | C6 H16 N5 O Cl2  |
|          | 244.0729   | 1.0  | 4.1  | 5.5 | 953.3 | 10.479 | 0.00     | C5 H10 N9 O S    |

## b) 1-((1H-indol-4-yl)oxy)-3-chloropropan-2-ol, 2a

## Elemental Composition Report

Page 1

## Single Mass Analysis

Tolerance = 5.0 PPM / DBE: min = -2.0, max = 50.0

Element prediction: Off

Number of isotope peaks used for i-FIT = 2

Monoisotopic Mass, Even Electron Ions

462 formula(e) evaluated with 1 results within limits (all results (up to 1000) for each mass)

Elements Used:

C: 0-100 H: 0-500 N: 0-10 O: 0-20 Cl: 0-1

2018-465 104 (2.032) AM2 (Ar,35000.0,0.00,0.00); Cm (103:106)

1: TOF MS ASAP+

2.42e+006

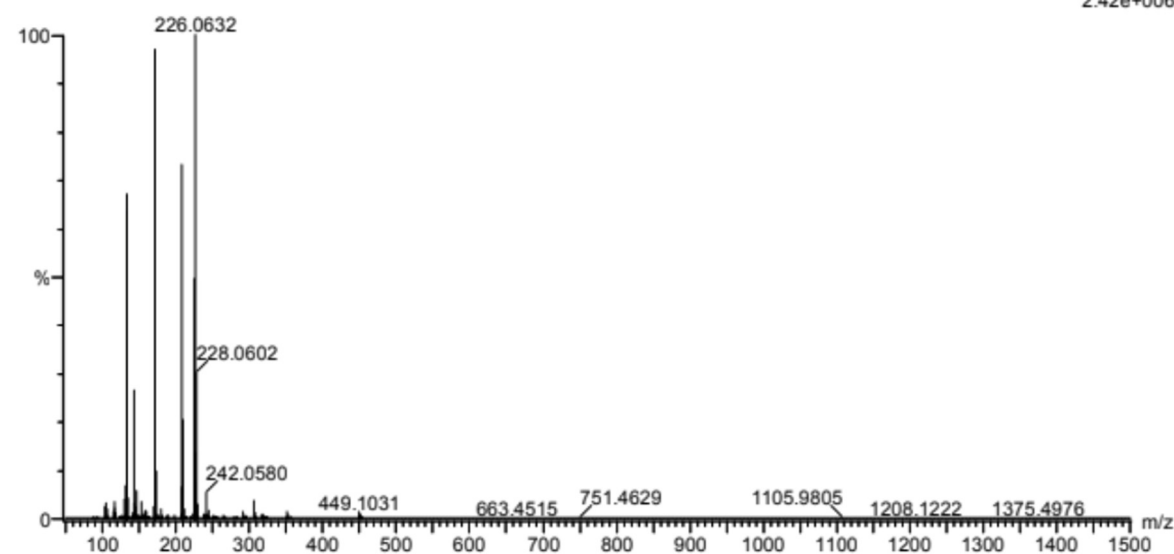

Minimum: -2.0  
 Maximum: 5.0 5.0 50.0

| Mass     | Calc. Mass | mDa  | PPM  | DBE | i-FIT  | Norm | Conf(%) | Formula         |
|----------|------------|------|------|-----|--------|------|---------|-----------------|
| 226.0632 | 226.0635   | -0.3 | -1.3 | 5.5 | 1073.1 | n/a  | n/a     | C11 H13 N O2 Cl |

## c) Practolol, (N-(4-(2-hydroxy-3-(isopropylamino)propoxy)phenyl)acetamide), 1c

## Elemental Composition Report

Page 1

## Single Mass Analysis

Tolerance = 2.0 PPM / DBE: min = -1.5, max = 50.0

Element prediction: Off

Number of isotope peaks used for i-FIT = 3

Monoisotopic Mass, Even Electron Ions

1921 formula(e) evaluated with 2 results within limits (all results (up to 1000) for each mass)

Elements Used:

C: 0-500 H: 0-1000 N: 0-10 O: 0-10 Na: 0-1 S: 0-5

2018-162 45 (0.837) AM2 (Ar,35000.0,0.00,0.00); Cm (45:46)

1: TOF MS ES+

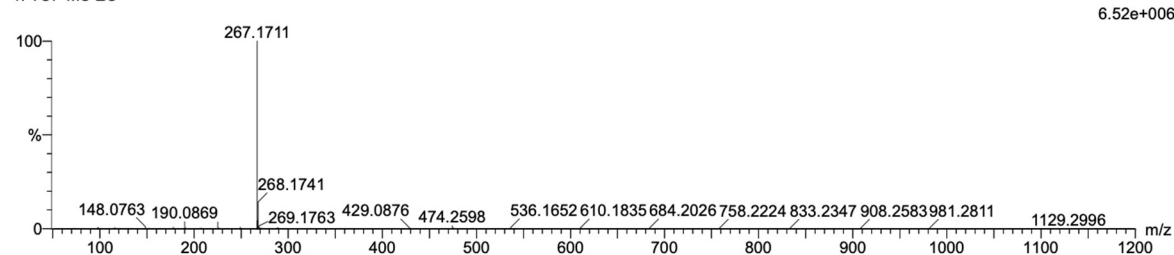

Minimum: -1.5  
Maximum: 5000.0 2.0 50.0

| Mass     | Calc. Mass | mDa  | PPM  | DBE | i-FIT  | Norm   | Conf (%) | Formula       |
|----------|------------|------|------|-----|--------|--------|----------|---------------|
| 267.1711 | 267.1709   | 0.2  | 0.7  | 4.5 | 1681.8 | 0.000  | 100.00   | C14 H23 N2 O3 |
|          | 267.1716   | -0.5 | -1.9 | 0.5 | 1699.8 | 17.988 | 0.00     | C7 H23 N8 O S |

## d) 5-(3-Chloro-2-hydroxypropoxy)-3,4-dihydroquinolin-2(1H)-one, 4a

## Elemental Composition Report

Page 1

## Single Mass Analysis

Tolerance = 2.0 PPM / DBE: min = -50.0, max = 100.0

Element prediction: Off

Number of isotope peaks used for i-FIT = 6

Monoisotopic Mass, Even Electron Ions

3565 formula(e) evaluated with 2 results within limits (all results (up to 1000) for each mass)

Elements Used:

C: 0-100 H: 0-100 N: 0-8 O: 0-8 Na: 0-1 Cl: 0-3

SVG\_20201029\_S2F3 147 (2.723) AM2 (Ar,35000.0,0.00,0.00)

1: TOF MS ES+

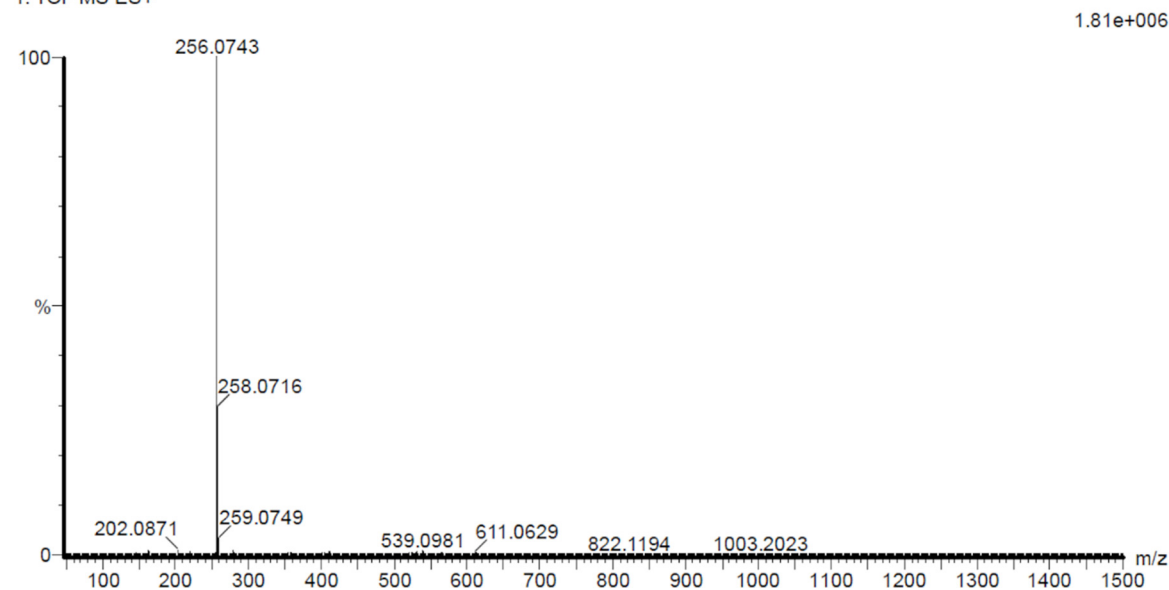

Minimum: -50.0  
Maximum: 5.0 2.0 100.0

| Mass     | Calc. Mass | mDa | PPM | DBE  | i-FIT  | Norm   | Conf (%) | Formula         |
|----------|------------|-----|-----|------|--------|--------|----------|-----------------|
| 256.0743 | 256.0740   | 0.3 | 1.2 | 5.5  | 2797.0 | 0.000  | 100.00   | C12 H15 N O3 Cl |
|          | 256.0738   | 0.5 | 2.0 | 11.5 | 2819.6 | 22.647 | 0.00     | C16 H11 N O Na  |



#### 4. IR spectra

a) Practolol, (N-(4-(2-hydroxy-3-(isopropylamino)propoxy)phenyl)acetamide), 1c

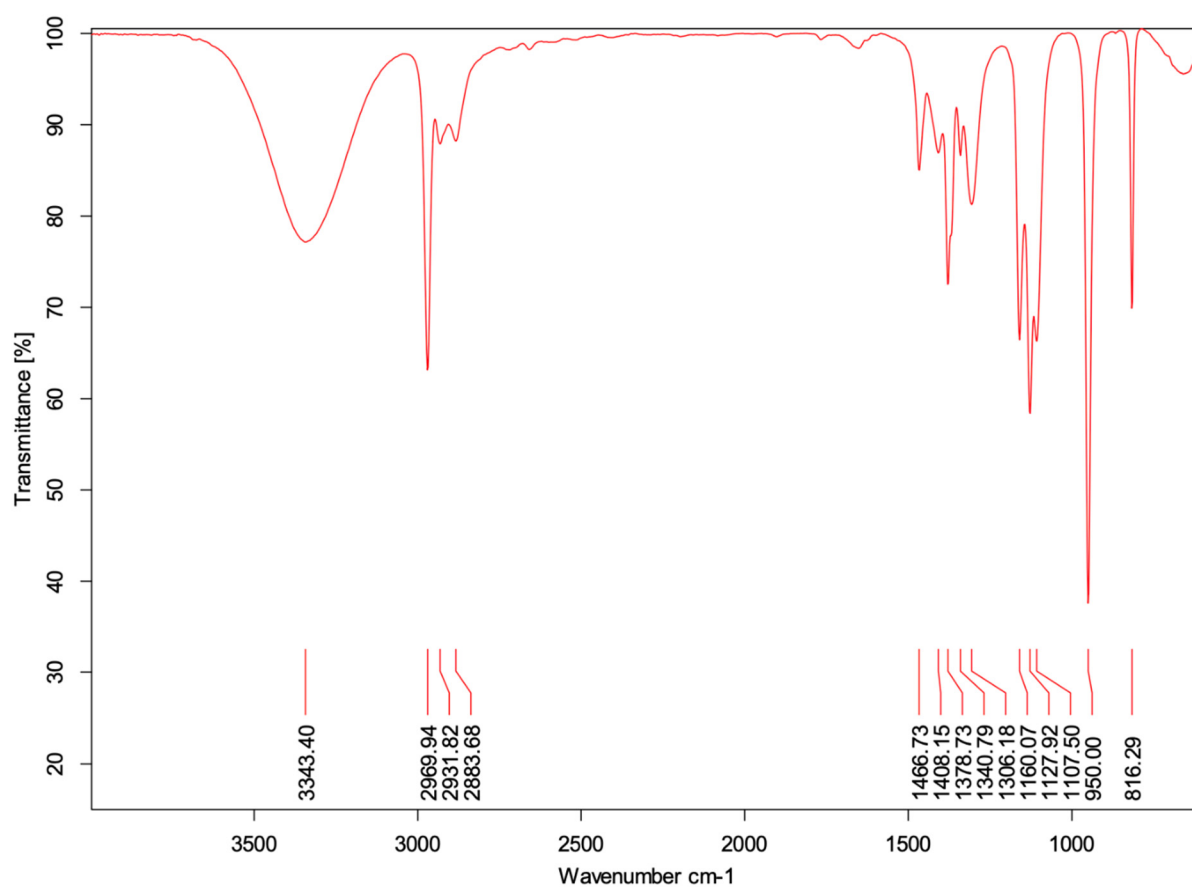

## 5. Chromatograms from kinetic resolution of *N*-(4-(3-chloro-2-hydroxypropoxy)phenyl)acetamide, **1a**

a) *N*-(4-(3-Chloro-2-hydroxypropoxy)phenyl)acetamide, **1a**

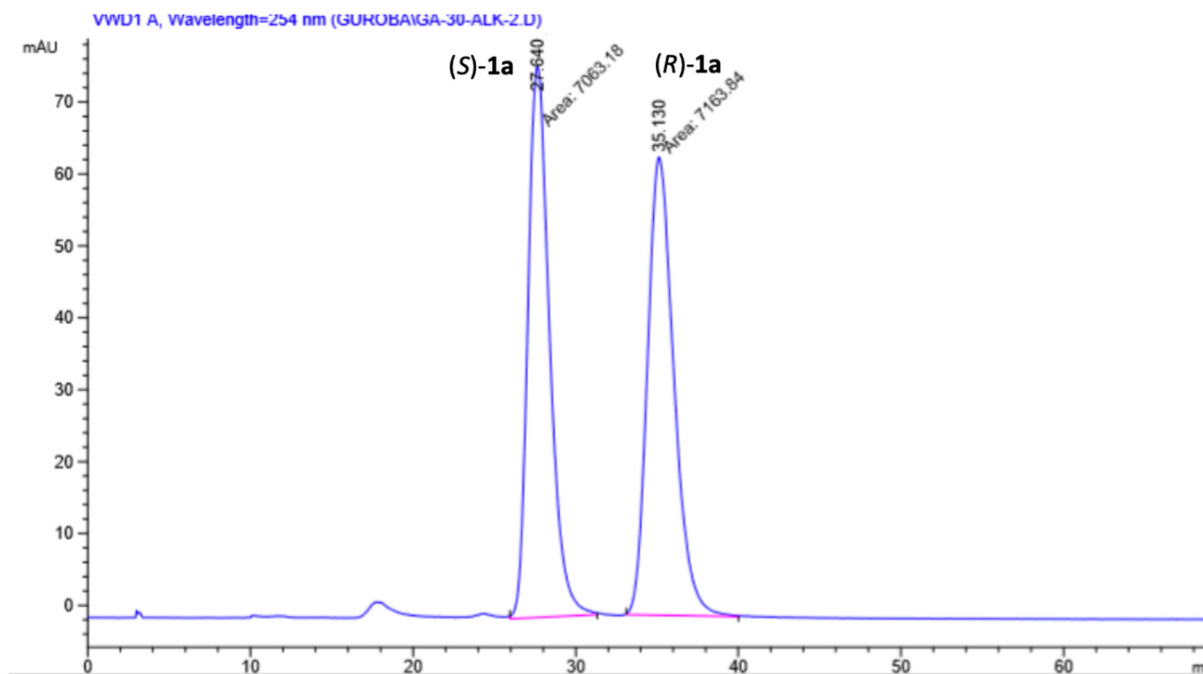

b) 1-(4-Acetamidophenoxy)-3-chloropropan-2-yl butanoate, **1b**

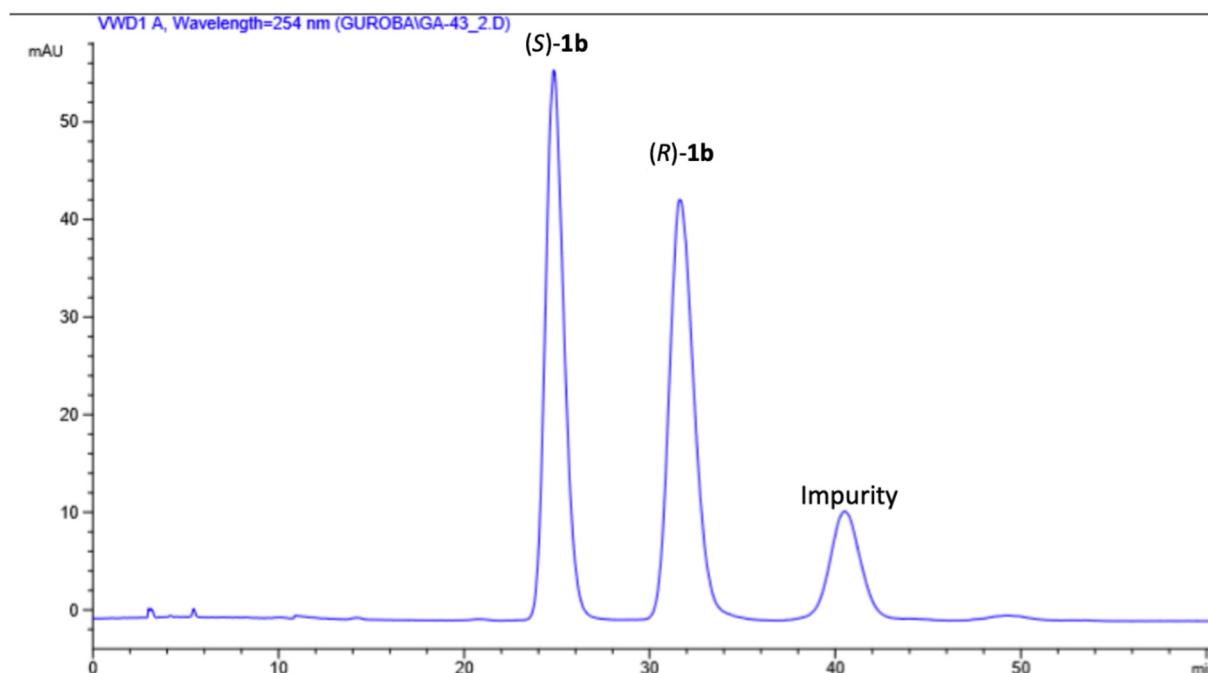

c) (R)-N-(4-(3-Chloro-2-hydroxypropoxy)phenyl)acetamide, (R)-1a

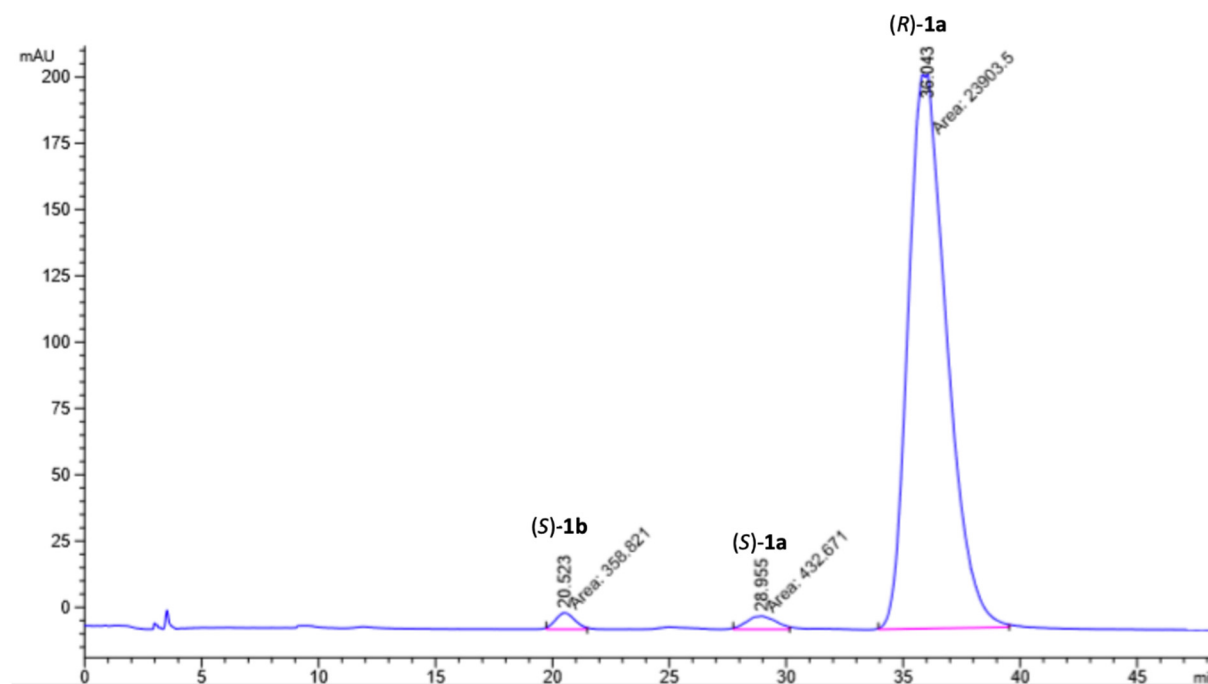

d) (S)-1-(4-Acetamidophenoxy)-3-chloropropan-2-yl butanoate, (S)-1b

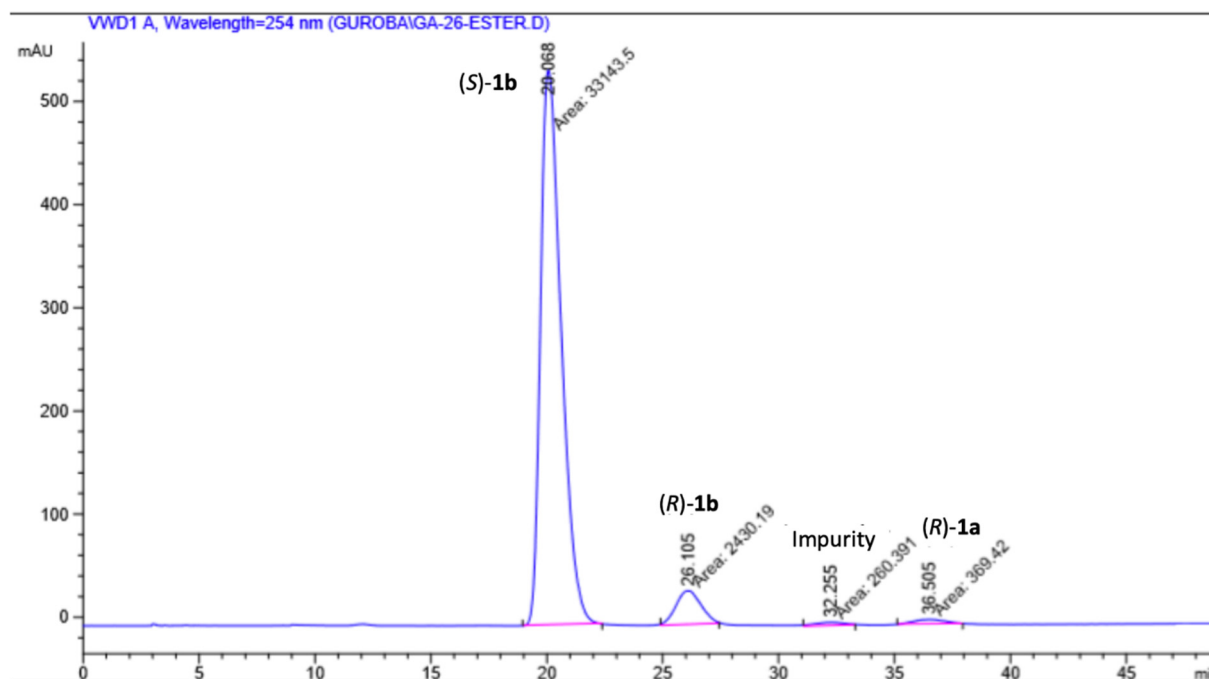

## 6. Chromatogram of kinetic resolution of (R)-1-chloro-3-(1H-indol-4-yloxy)-propan-2-ol, (R)-2a, at optimal reaction time

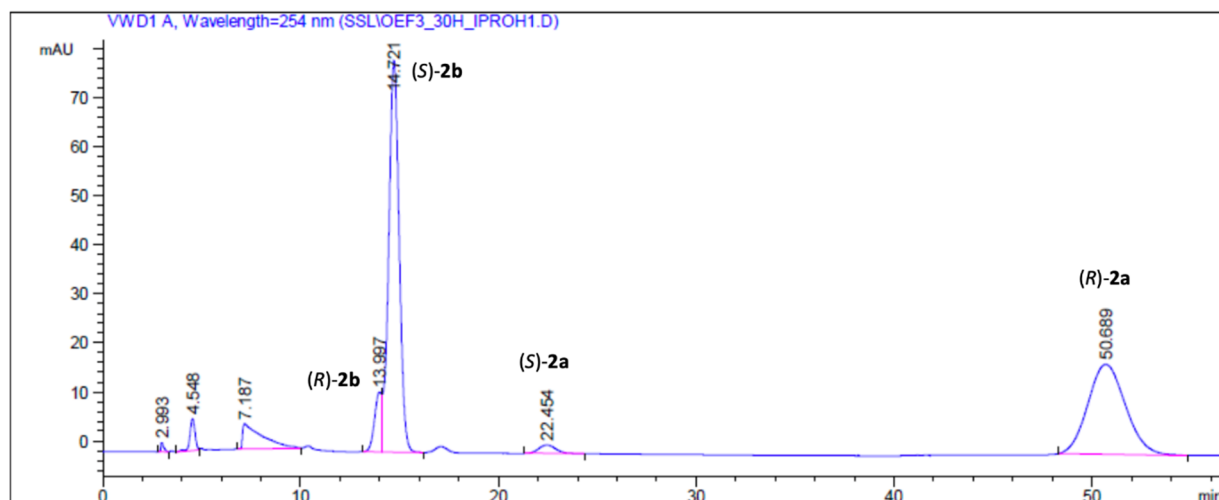

## 7. Chromatogram from kinetic resolution of 7-(3-chloro-2-hydroxypropoxy)-3,4-dihydroquinolin-2(1H)-one, 3a

a) 7-(3-chloro-2-hydroxypropoxy)-3,4-dihydroquinolin-2(1H)-one, 3a

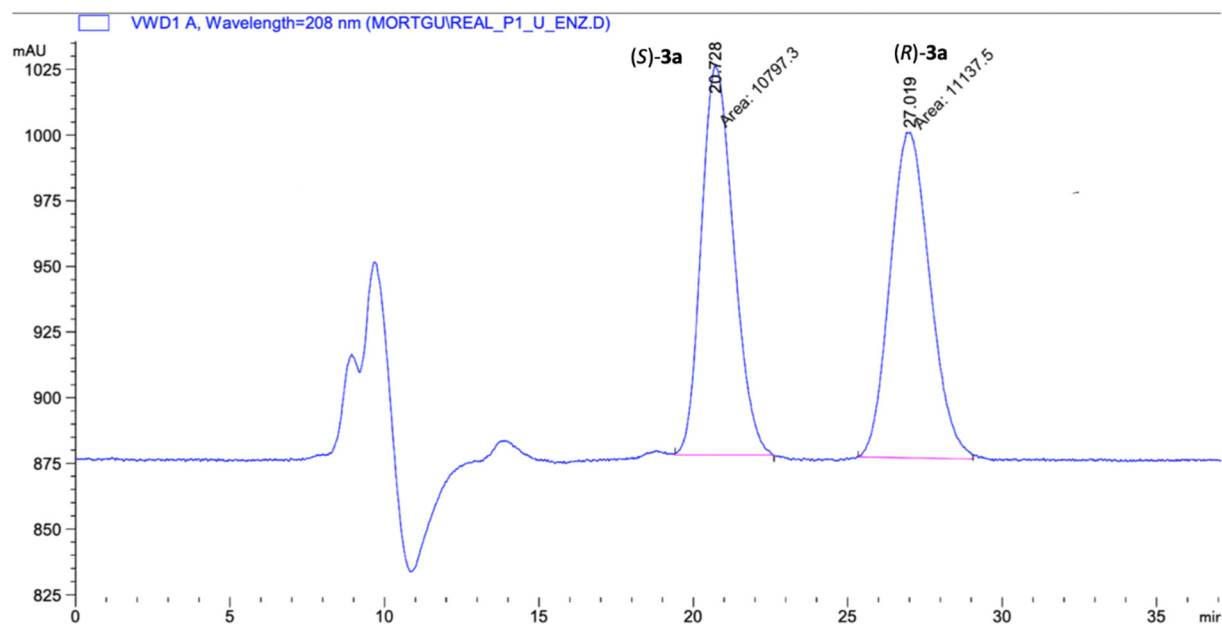

b) 1-chloro-3-((2-oxo-1,2,3,4-tetrahydroquinolin-7-yl)oxy)propan-2-yl butanoate, 3b

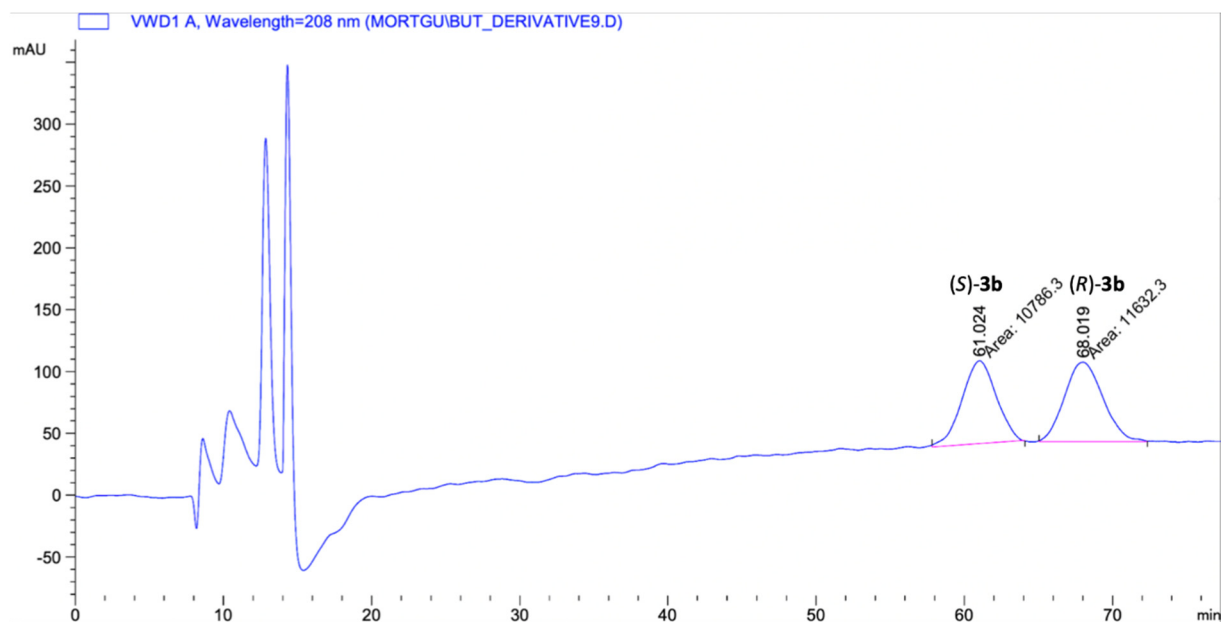

c) (R)-7-(3-chloro-2-hydroxypropoxy)-3,4-dihydroquinolin-2(1H)-one, (R)-3a

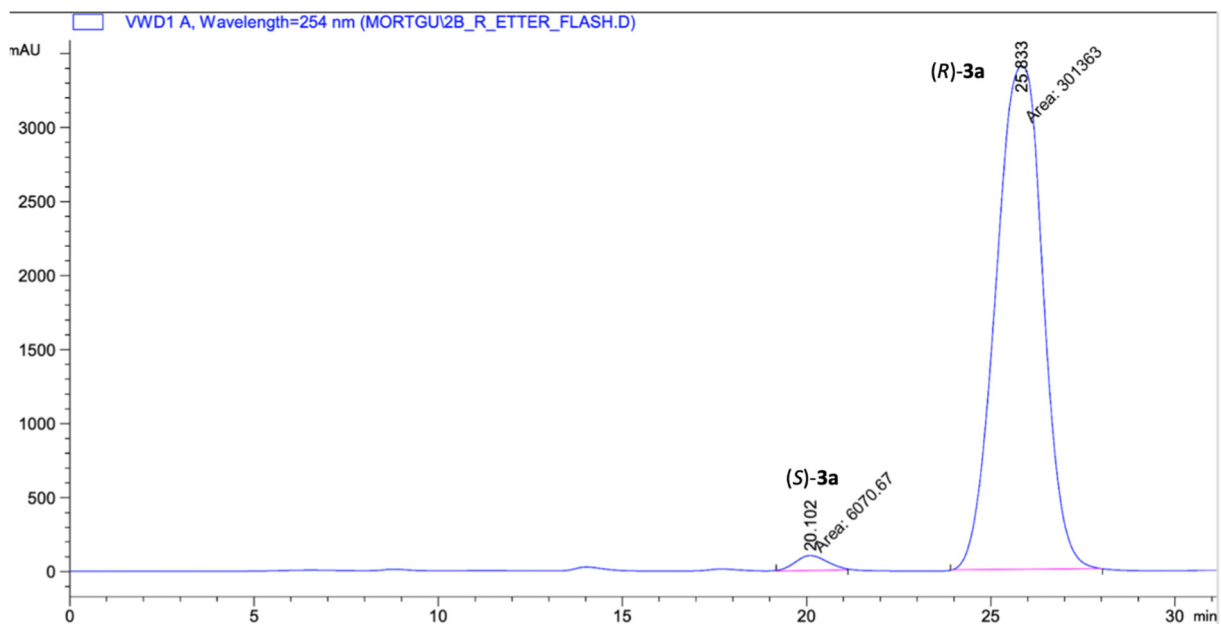

d) (S)-1-chloro-3-((2-oxo-1,2,3,4-tetrahydroquinolin-7-yl)oxy)propan-2-yl butanoate, (S)-3b

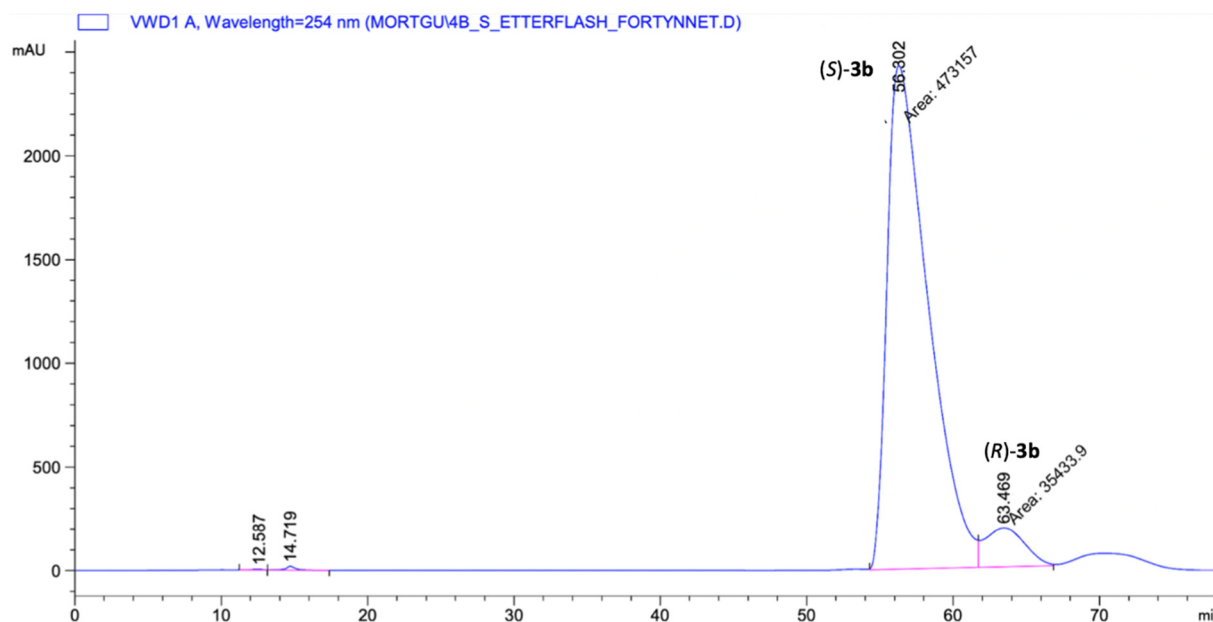

8. Chromatogram from kinetic resolution of 5-(3-chloro-2-hydroxypropoxy)-3,4-dihydroquinolin-2(1H)-one, 4a

a) 5-(3-chloro-2-hydroxypropoxy)-3,4-dihydroquinolin-2(1H)-one, 4a

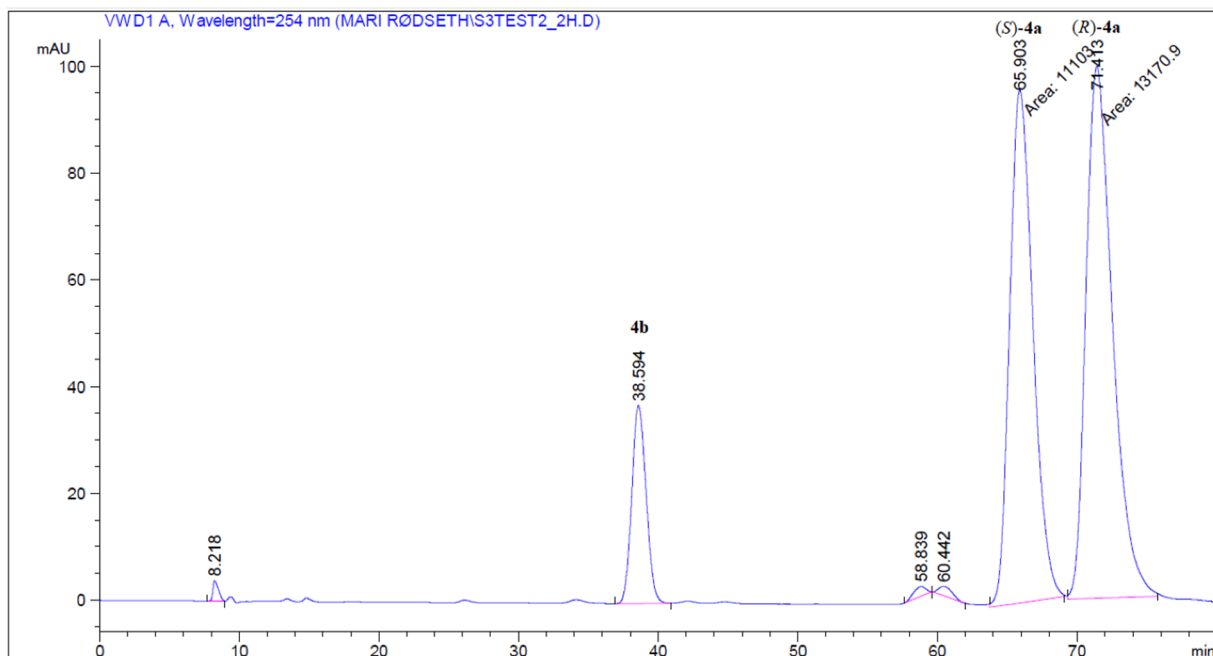

b) (R)-5-(3-chloro-2-hydroxypropoxy)-3,4-dihydroquinolin-2(1H)-one, (R)-4a

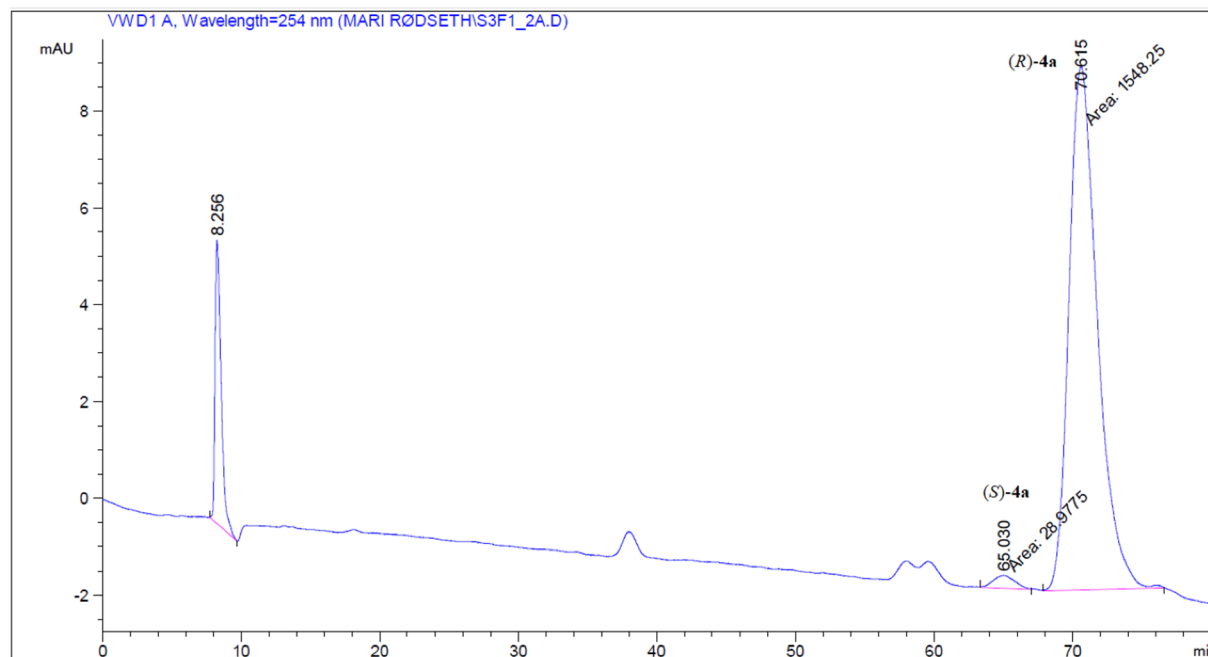

c) (S)-1-chloro-3-((2-oxo-1,2,3,4-tetrahydroquinolin-5-yl)oxy)propan-2-yl butyrate, (S)-4b

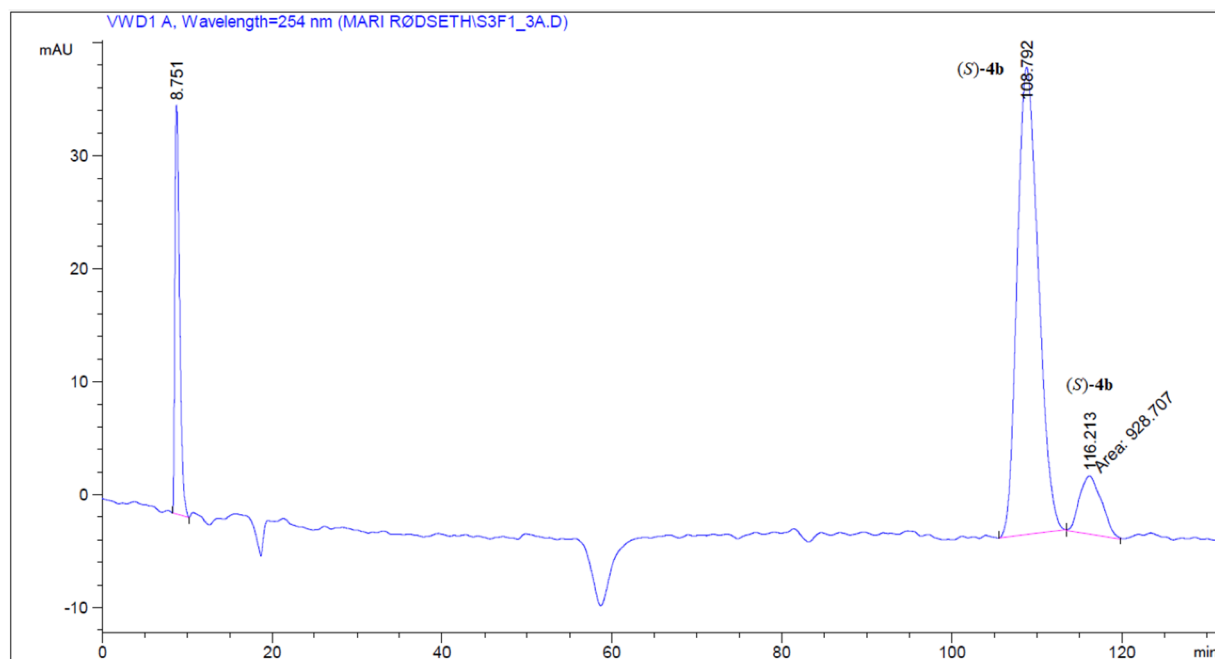

## 9. Chromatogram of enantiopure drugs

a) (S)-Practolol, (S)-(N-(4-(2-hydroxy-3-(isopropylamino)propoxy)phenyl)-acetamide), (S)-1c

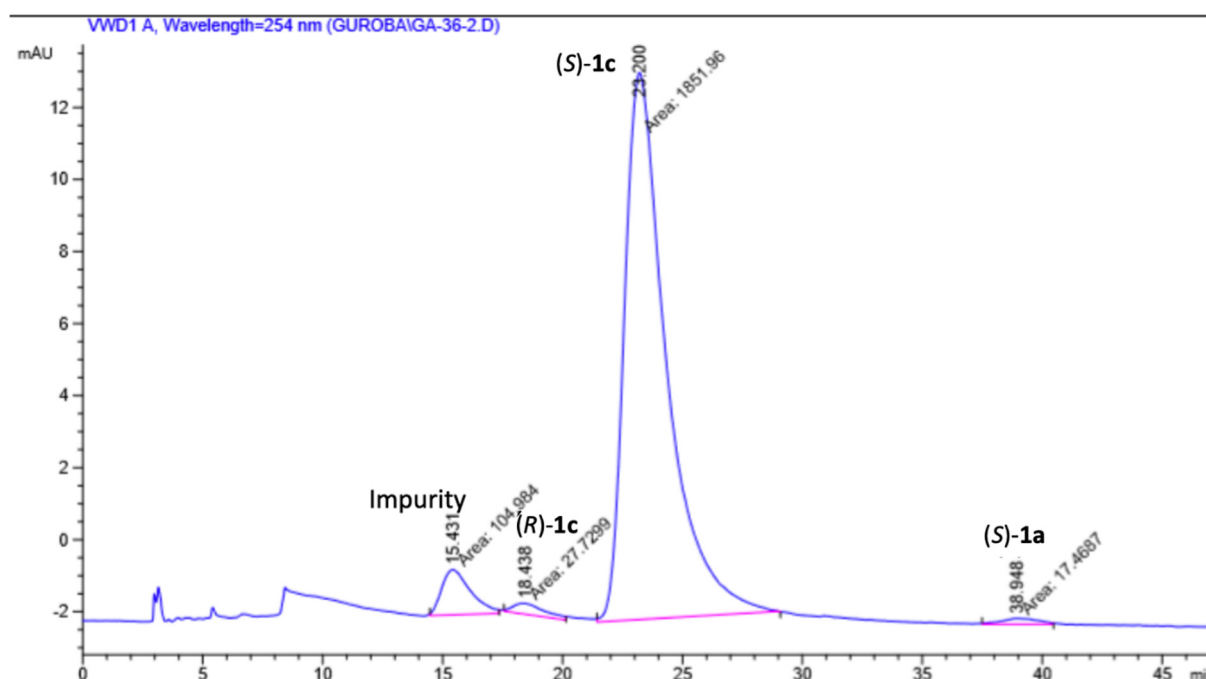

b) (S)-7-(3-(tert-Butylamino)-2-hydroxypropoxy)-3,4-dihydroquinolin-2(1H)-one, (S)-3c

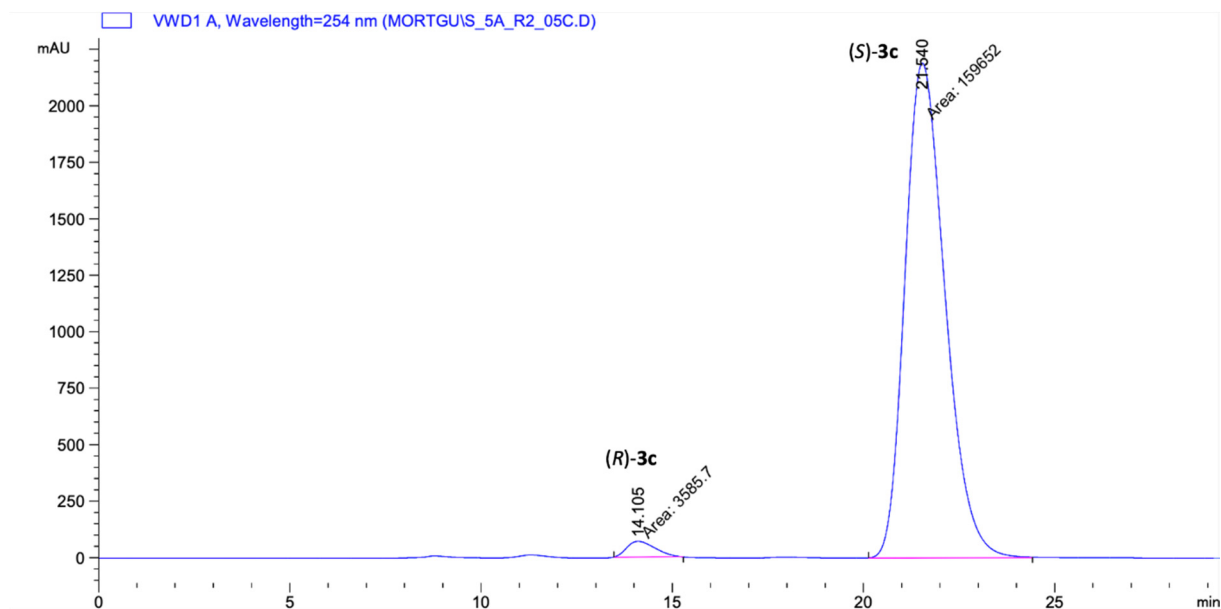



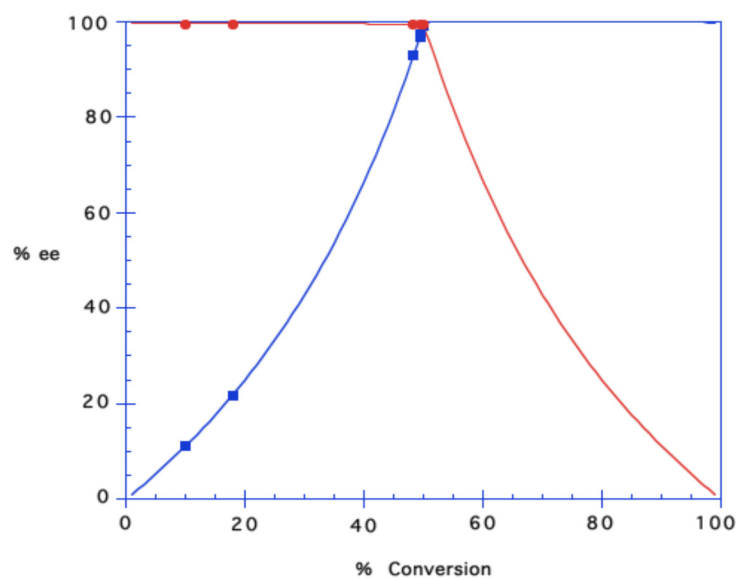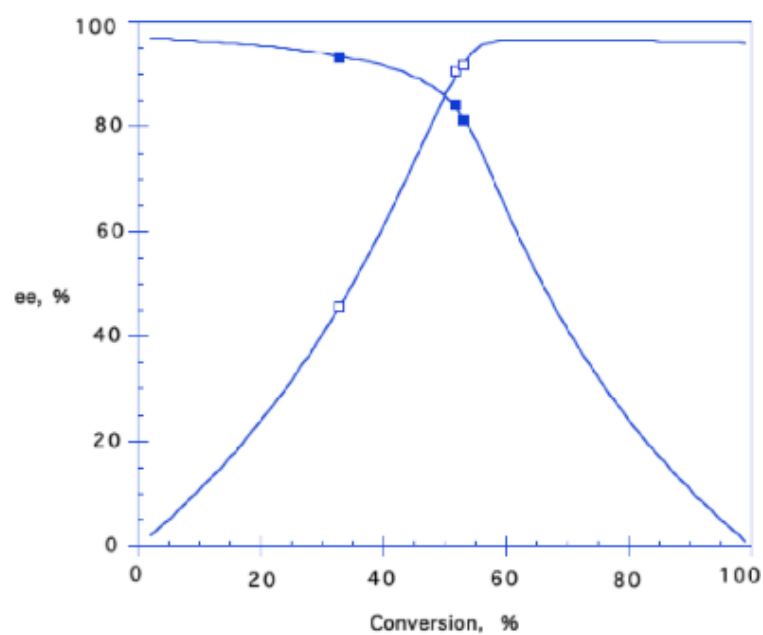

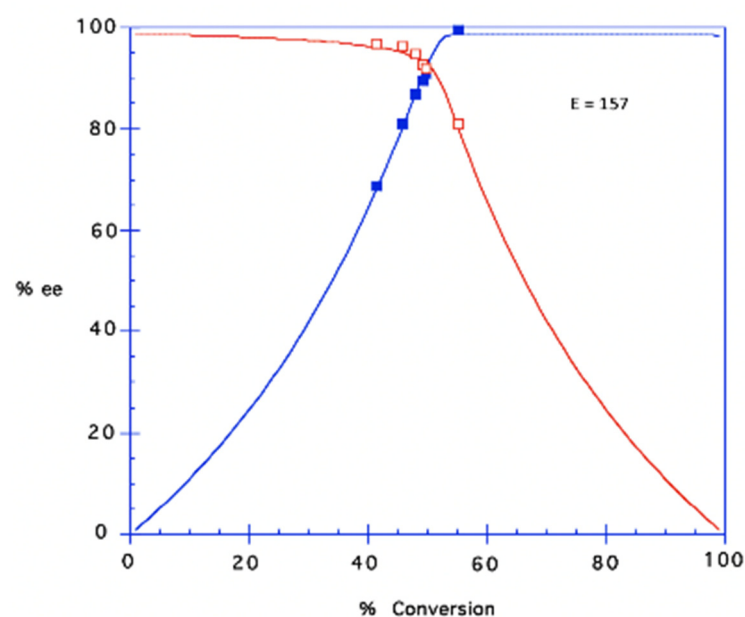

**Figure 1.** Graphical illustration of reaction progress of kinetic resolution at different degrees of conversion. Upper panel: **1a**  $ee_p$  (red filled squares) and  $ee_s$  (blue filled squares);  $E$ -value  $>200$ . Middle panel: kinetic resolution of **2a**  $ee_p$  (filled squares) and  $ee_s$  (open squares)  $E = 66$ . Lower panel: **3a**  $ee_p$  (open red squares) and  $ee_s$  (filled blue squares);  $E = 157$ . All three reactions used CALB from SyncoZymes as catalyst and vinyl butanoate as acyl donor in different solvents. All reactions were performed at 30 °C.  $E$ -values calculated from *E&K Calculator 2.1b0 PPC* [24].
